# Supplementary material
Source: MDPI journal article supplement (https://www.mdpi.com/2073-4352/13/1/16)
Supplement: s1 [file s1]

## Supporting Information

### **Stereochemistry of a $[\text{Zn}(\text{L})_2]^{2+}$ complex: Structural determination by solution-state NMR spectroscopy, X-ray crystallography and DFT calculations.**

Berislav Perić,<sup>a,\*</sup> Natalija Pantalon Juraj,<sup>a</sup> Zoran Štefanić,<sup>b</sup> and Srećko I. Kirin<sup>a,\*</sup>

<sup>a</sup> Laboratory for Solid State and Complex Compounds Chemistry, Ruđer Bošković Institute, Bijenička c. 54, HR-10000 Zagreb, Croatia

<sup>b</sup> Laboratory for Chemical and Biological Crystallography, Ruđer Bošković Institute, Bijenička c. 54, HR-10000 Zagreb, Croatia

#### **Contents**

|                                                                                   |           |
|-----------------------------------------------------------------------------------|-----------|
| <b>Possible isomers of <math>[\text{M}(\text{A-B-C})_2]</math> complexes.....</b> | <b>2</b>  |
| <b>NMR spectroscopy .....</b>                                                     | <b>4</b>  |
| <b>DFT-NMR calculations and correlations with experiment .....</b>                | <b>17</b> |
| <b>X-ray crystallography .....</b>                                                | <b>38</b> |
| <b>Additional characterization .....</b>                                          | <b>41</b> |

## Possible isomers of $[M(A-B-C)_2]$ complexes

Enumeration of different isomers of  $[M(A-B-C)_2]$  complexes start from three isomers of  $[M(A-B-A)_2]$  complexes [Ref. 3 in manuscript]. The *cis-fac* isomer can exist in two enantiomeric configurations  $\Delta$  and  $\Lambda$ :

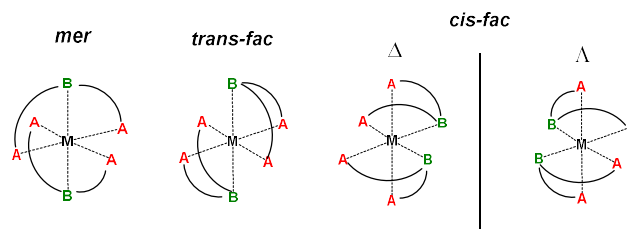

**Figure S1.** Different isomers of  $[M(A-B-A)_2]$  complexes.

One **A** coordinating atom on each of two coordination ligands can be replaced with **C** coordinating atom leading to four modifications for each  $[M(A-B-A)_2]$  isomer. It is sufficient to consider only one enantiomer of the *cis-fac*  $[M(A-B-A)_2]$  isomer; the other modified enantiomers are obtained by mirror symmetry of the considered modified enantiomers.

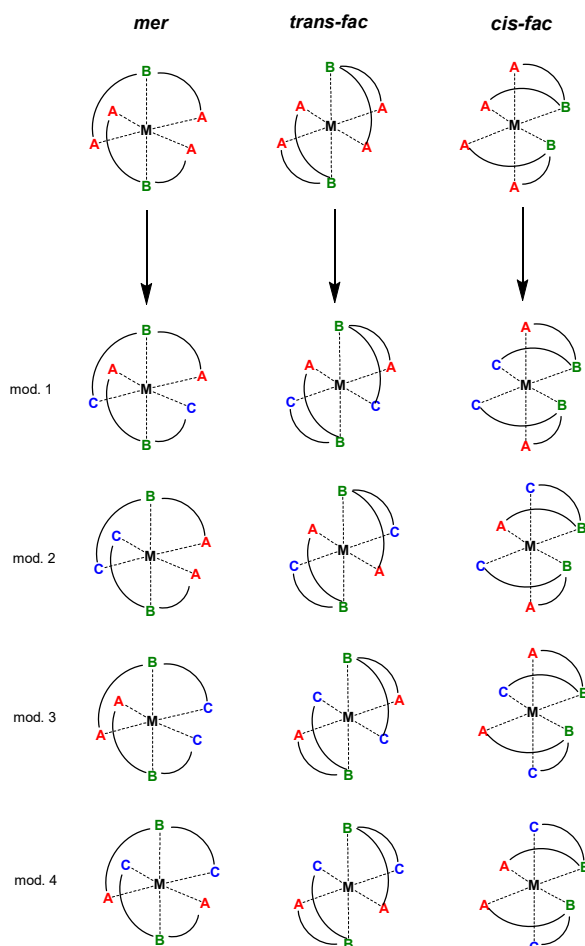

**Figure S2.** Modifications of  $[M(A-B-A)_2]$  complexes obtained by replacing one **A** coordinating atom on each ligand by **C** coordinating atom as all possible forms of the  $[M(A-B-C)_2]$  complexes

There are several equalities among 12 modifications given in Figure S2. Identical structures, i.e. those that can be converted one into another by proper rotations are given in Figure S3:

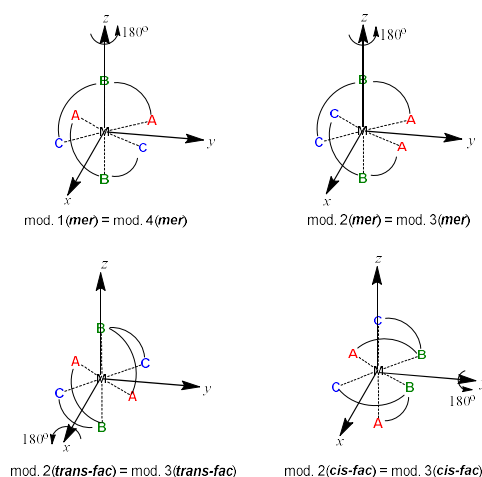

**Figure S3.** Rotations around  $z$ ,  $x$  or  $y$  axes which show equalities of several modifications given in Figure S2.

Modification 2 (or 3) of *trans-fac* isomer (Figure S2) is centrosymmetric. Modification 2 of *mer* isomer is an opposite enantiomer of modification 1 of *mer* isomer; modification 4 of *trans-fac* isomer is an opposite enantiomer of modification 1 of *trans-fac* isomer. Mirror symmetry conversions are shown in Figure S4.

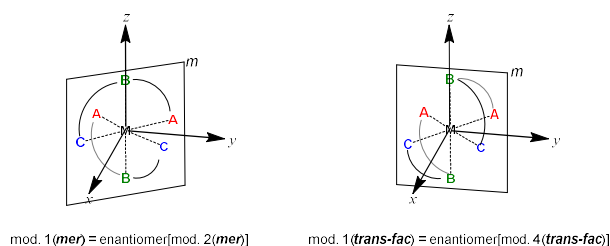

**Figure S4.** Mirror symmetries ( $m$ ) between modifications of *mer* and *trans-fac* isomers converting modified structures into their enantiomer forms. In the case of *mer* isomer, mirror plane is the plane of the “upper” ligand, in the case of *trans-fac* isomer, mirror plane is the  $yz$  plane.

Taking equalities given in Figures S3 and S4, the  $[M(A-B-C)_2]$  modifications of  $[M(A-B-A)_2]$  isomers can be grouped in six groups shown in Figure S5.  $\Delta$  and  $\Lambda$  enantiomers of three *cis-fac* types are generated from  $\Delta$  and  $\Lambda$  enantiomers of *cis-fac* isomer of the  $[M(A-B-A)_2]$  complex (Figure S1)].

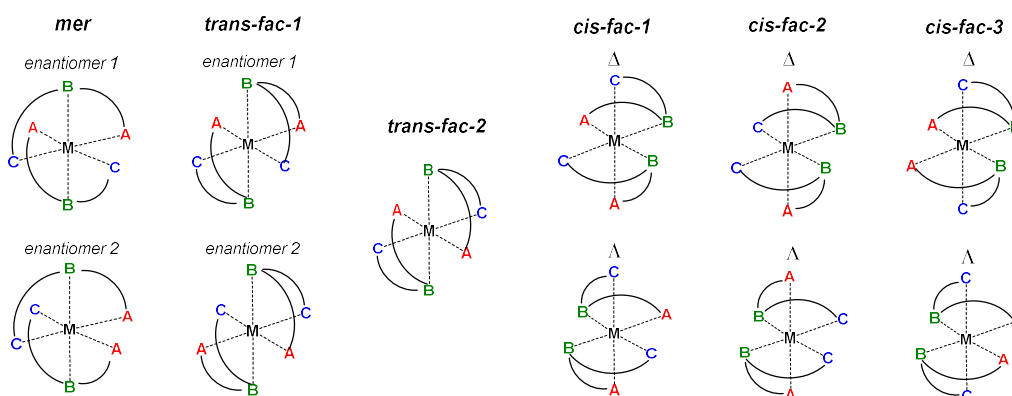

**Figure S5.** Six groups of structural different  $[M(A-B-C)_2]$  isomers generated from modifications of  $[M(A-B-A)_2]$  isomers. One enantiomer from each group is given in **Scheme 2** of the manuscript.

## NMR spectroscopy

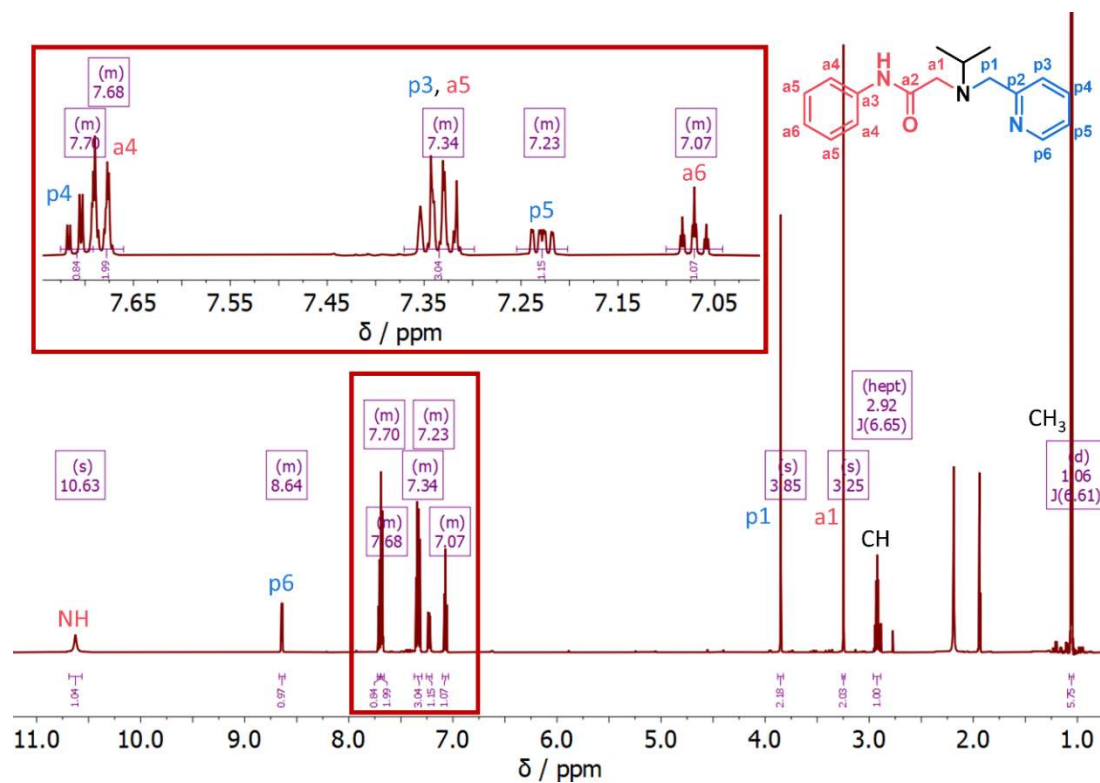

Figure S6. <sup>1</sup>H NMR (CD<sub>3</sub>CN) of ligand L

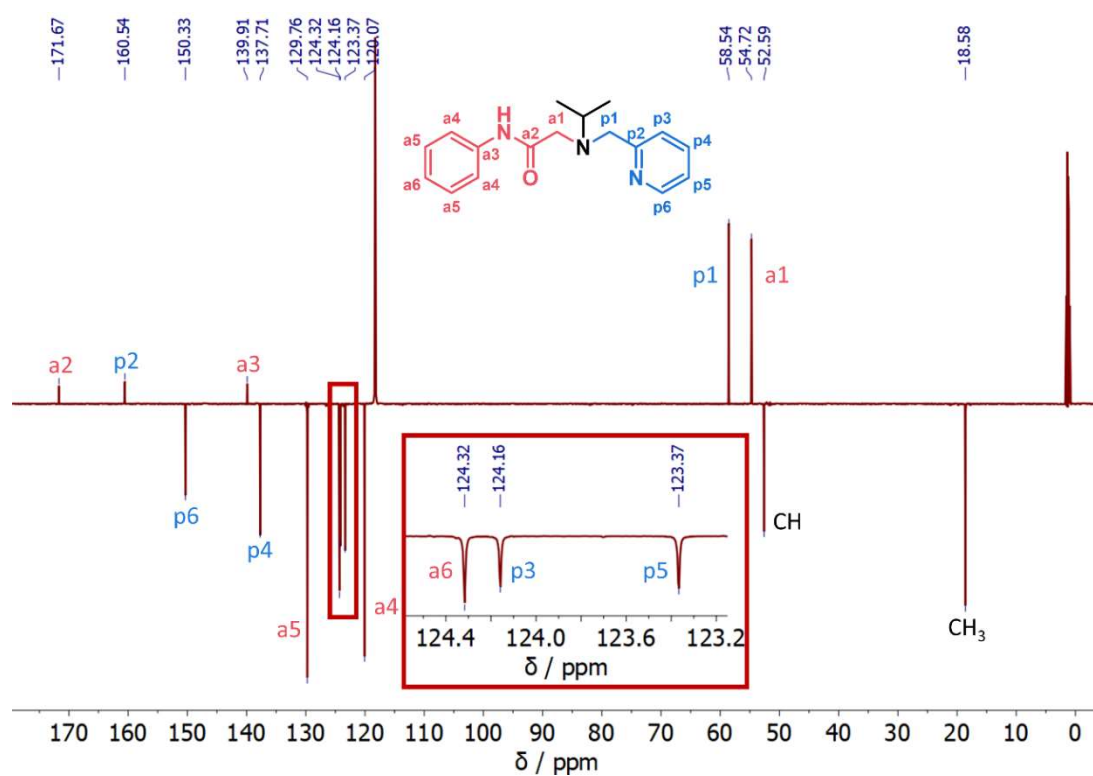

Figure S7. <sup>13</sup>C APT NMR (CD<sub>3</sub>CN) of ligand L

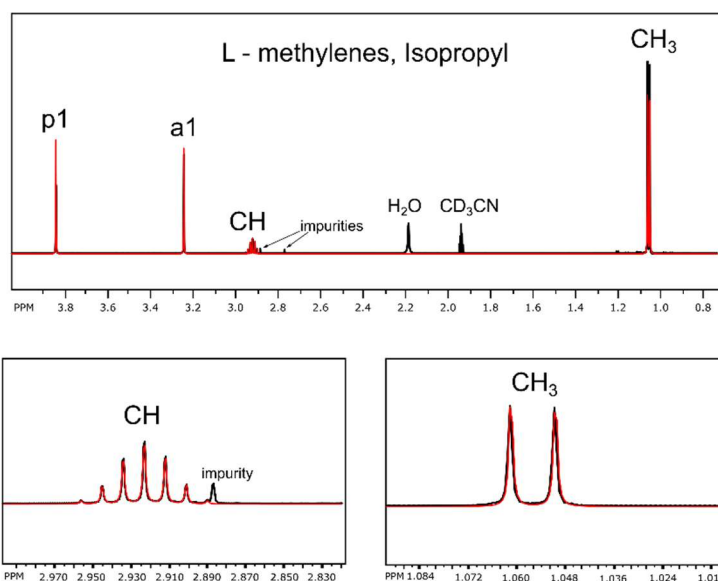

**Figure S8.** Comparison of the  $^1\text{H}$  NMR experimental spectra of **L** in aliphatic region (black) and simulations (red) for Isopropyl and methylene spin systems, with parameters given in Table 2 of manuscript as the observed NMR parameters. Multiplets are shown enlarged in separate frames to emphasize the quality of the fit.

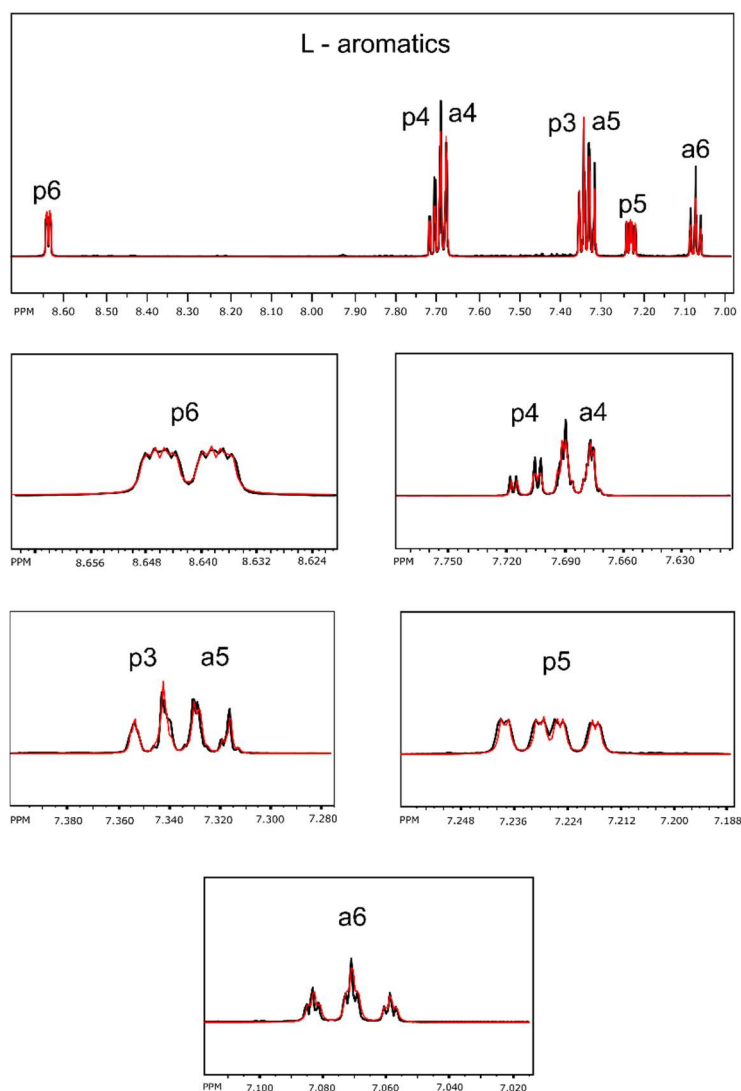

**Figure S9.** Comparison of the  $^1\text{H}$  NMR experimental spectra of **L** in aromatic region (black) and simulations (red) for Pyridyl and Phenyl spin systems with parameters given in Table 2 of manuscript as the observed NMR parameters. Multiplets are shown enlarged in separate frames to emphasize the quality of the fit.

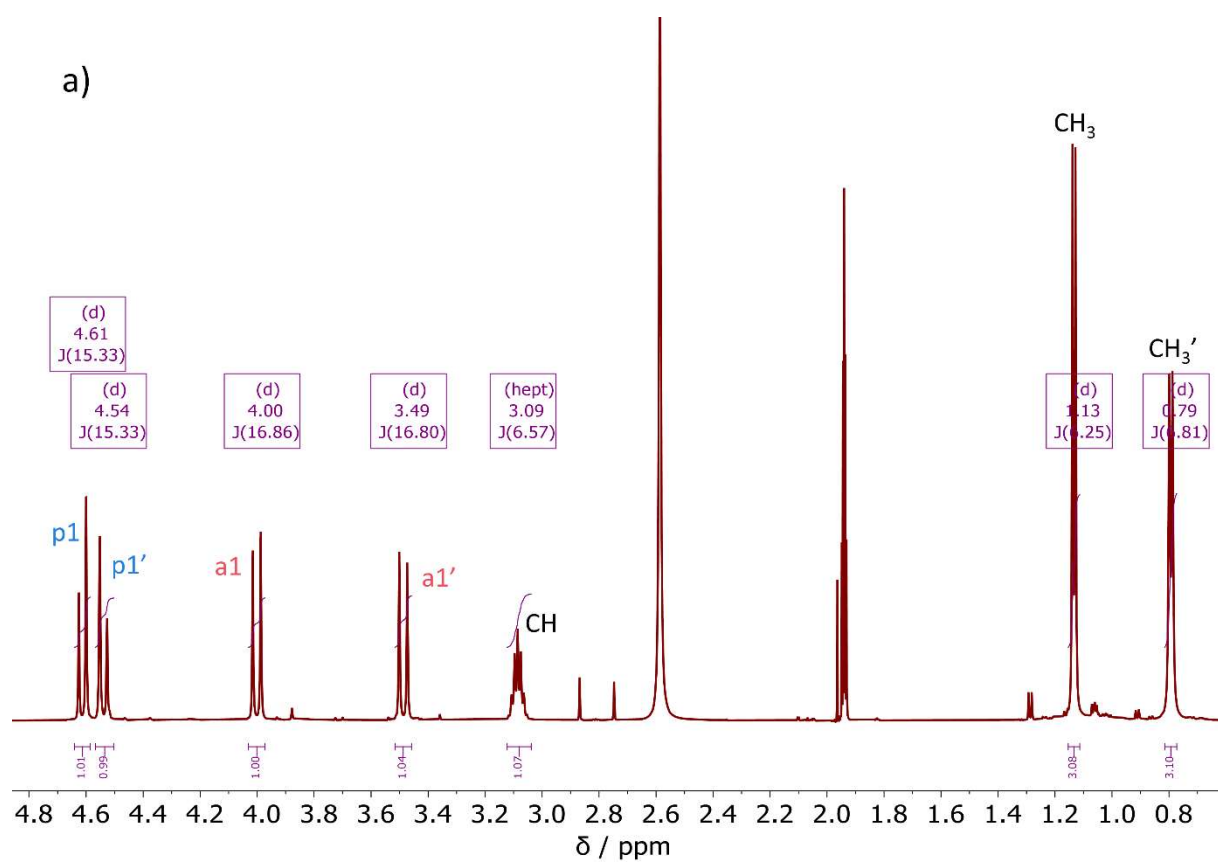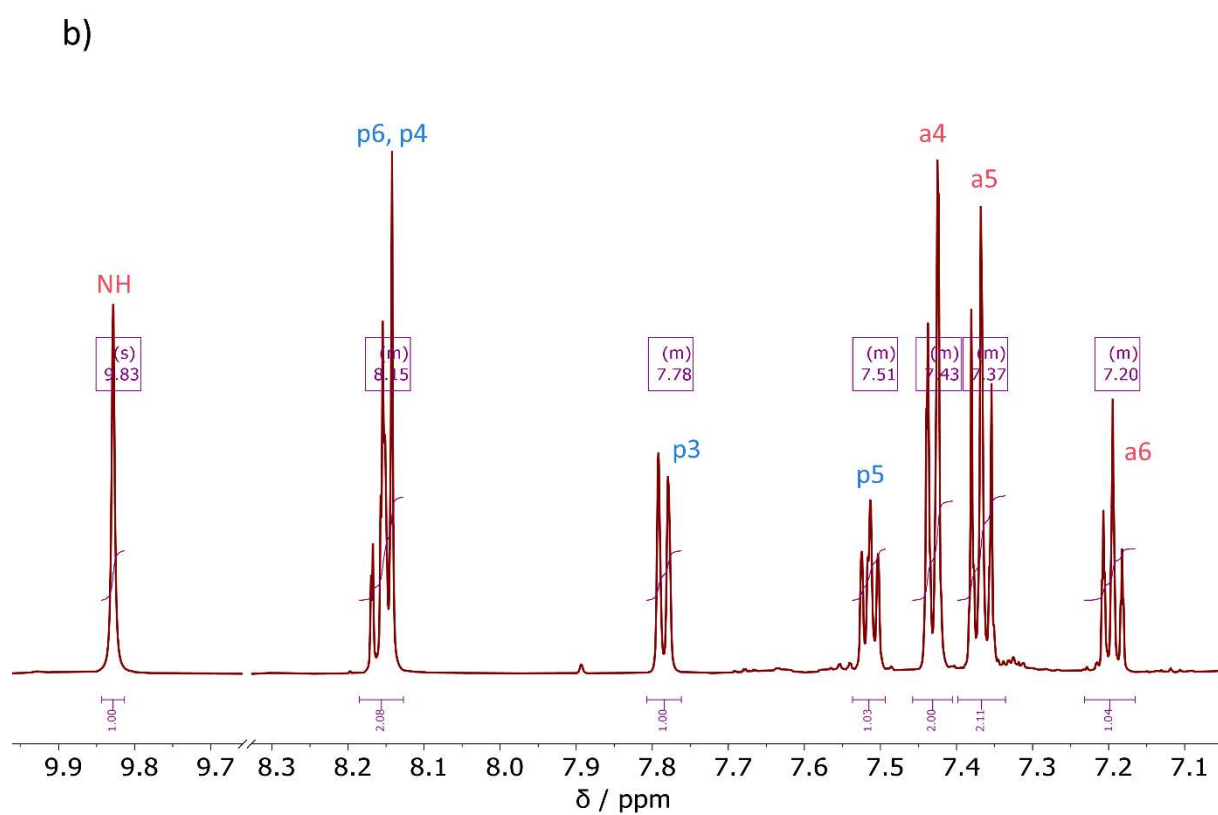

**Figure S10.**  $^1\text{H}$  NMR ( $\text{CD}_3\text{CN}$ ,  $-40\text{ }^\circ\text{C}$ ) of  $[\text{Zn}(\text{L})_2](\text{CF}_3\text{SO}_3)_2$ , aliphatic (a) and aromatic (b) region.

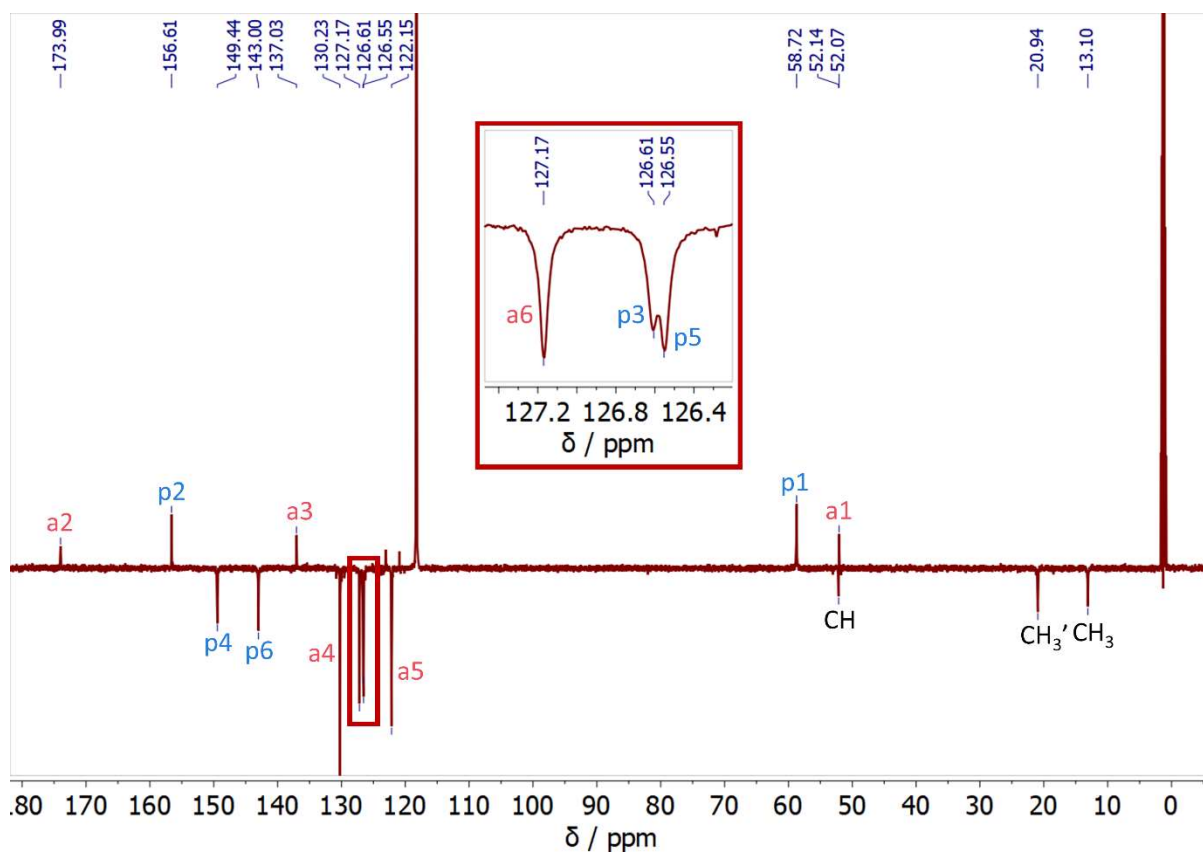

**Figure S11.**  $^{13}\text{C}$  APT NMR (CD $_3$ CN) of  $[\text{Zn}(\text{L})_2](\text{CF}_3\text{SO}_3)_2$

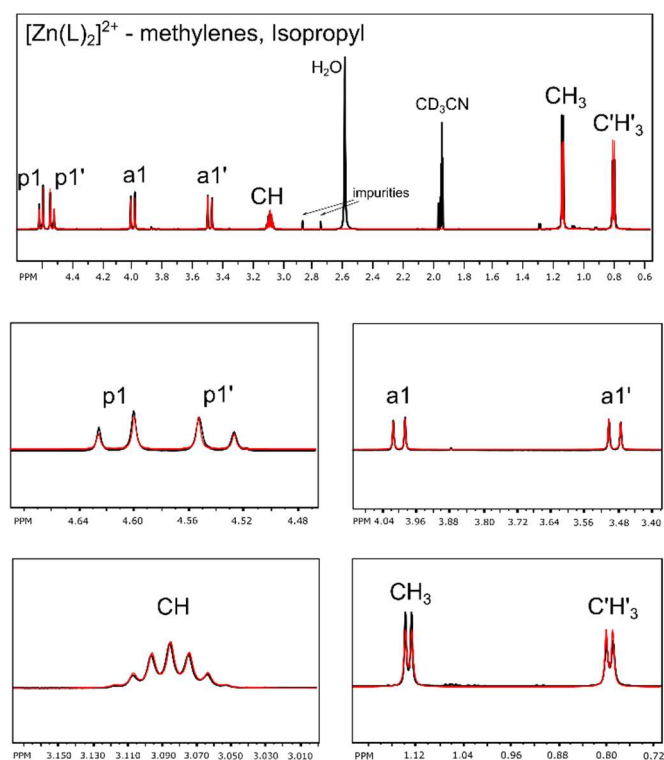

**Figure S12.** Comparison of the  $^1\text{H}$  NMR experimental spectra ( $-40^\circ\text{C}$ ) for  $[\text{Zn}(\text{L})_2]^{2+}$  in aliphatic region (black) and simulations (red) for Isopropyl and for methylene spin systems, with parameters given in Table 2 of manuscript as the observed NMR parameters. Multiplets are shown enlarged in separate frames to emphasize the quality of the fit.



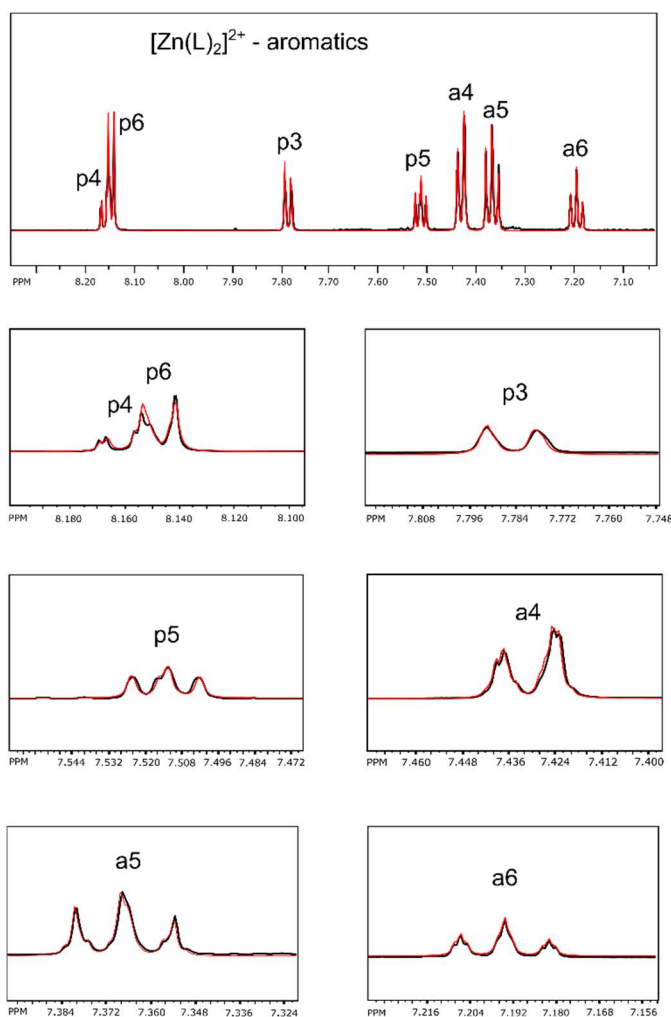

**Figure S13.** Comparison of the  $^1\text{H}$  NMR experimental spectra ( $-40\text{ }^\circ\text{C}$ ) for  $[\text{Zn}(\text{L})_2]^{2+}$  in aromatic region (black) and simulations (red) for Pyridyl and Phenyl spin systems with parameters given in Table 2 of manuscript as the observed NMR parameters. Multiplets are shown enlarged in separate frames to emphasize the quality of the fit.

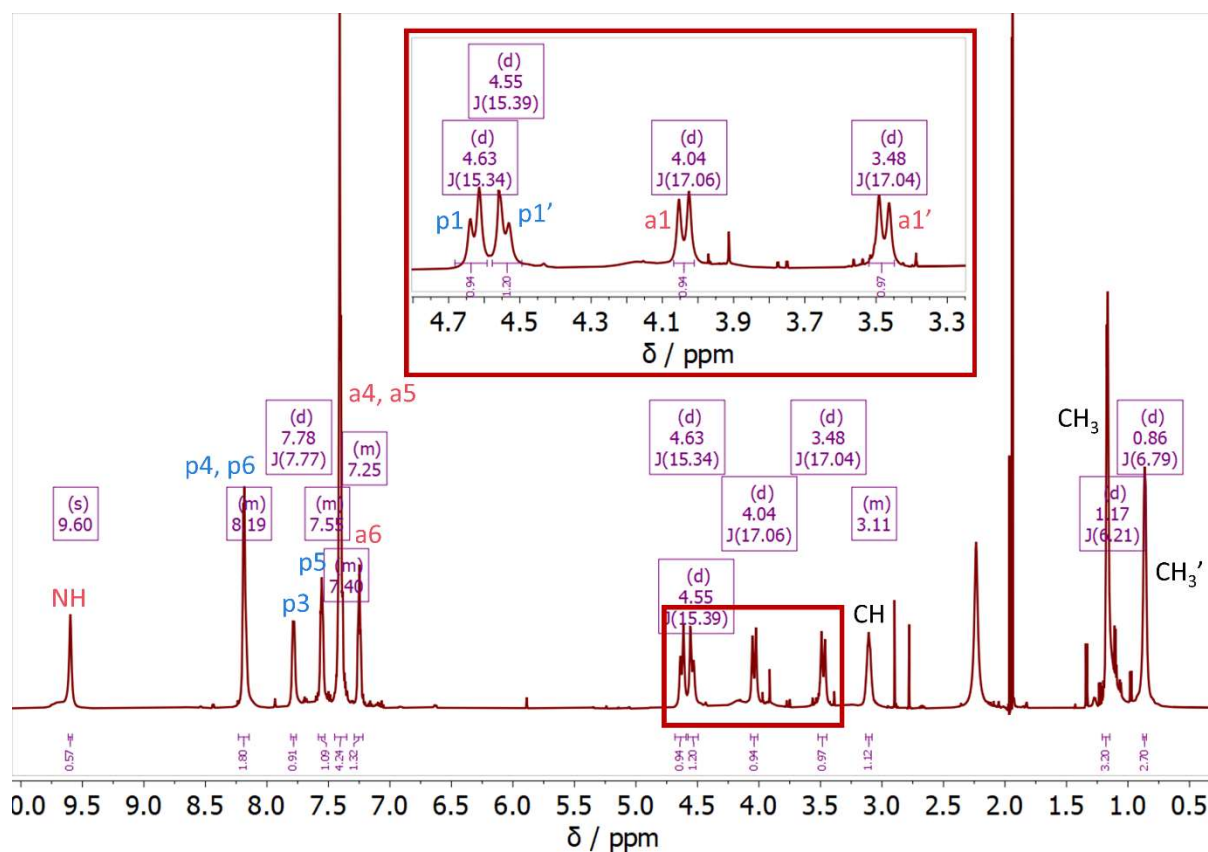

Figure S14.  $^1\text{H}$  NMR ( $\text{CD}_3\text{CN}$ ) of  $[\text{Zn}(\text{L})_2](\text{CF}_3\text{SO}_3)_2$  (room temperature)

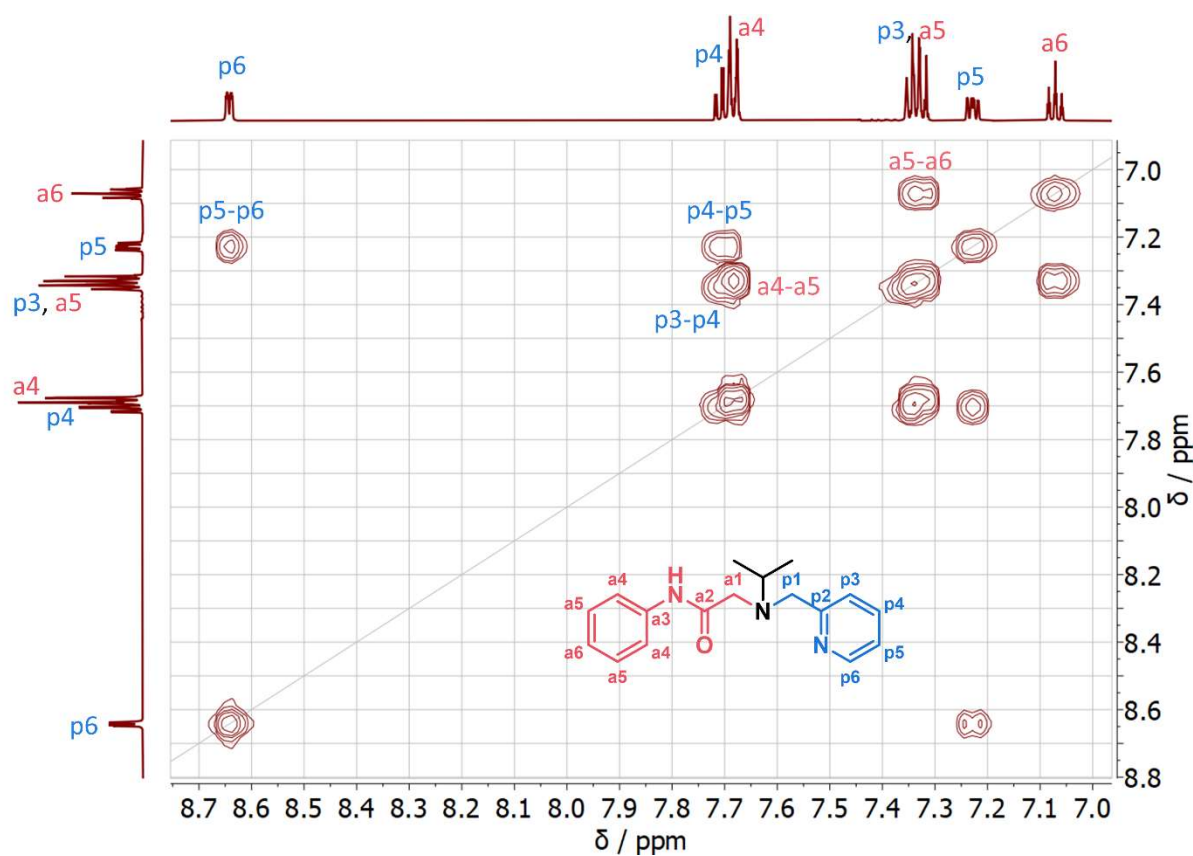

Figure S15.  $^1\text{H}$ - $^1\text{H}$  COSY NMR ( $\text{CD}_3\text{CN}$ , aromatic region) of ligand L

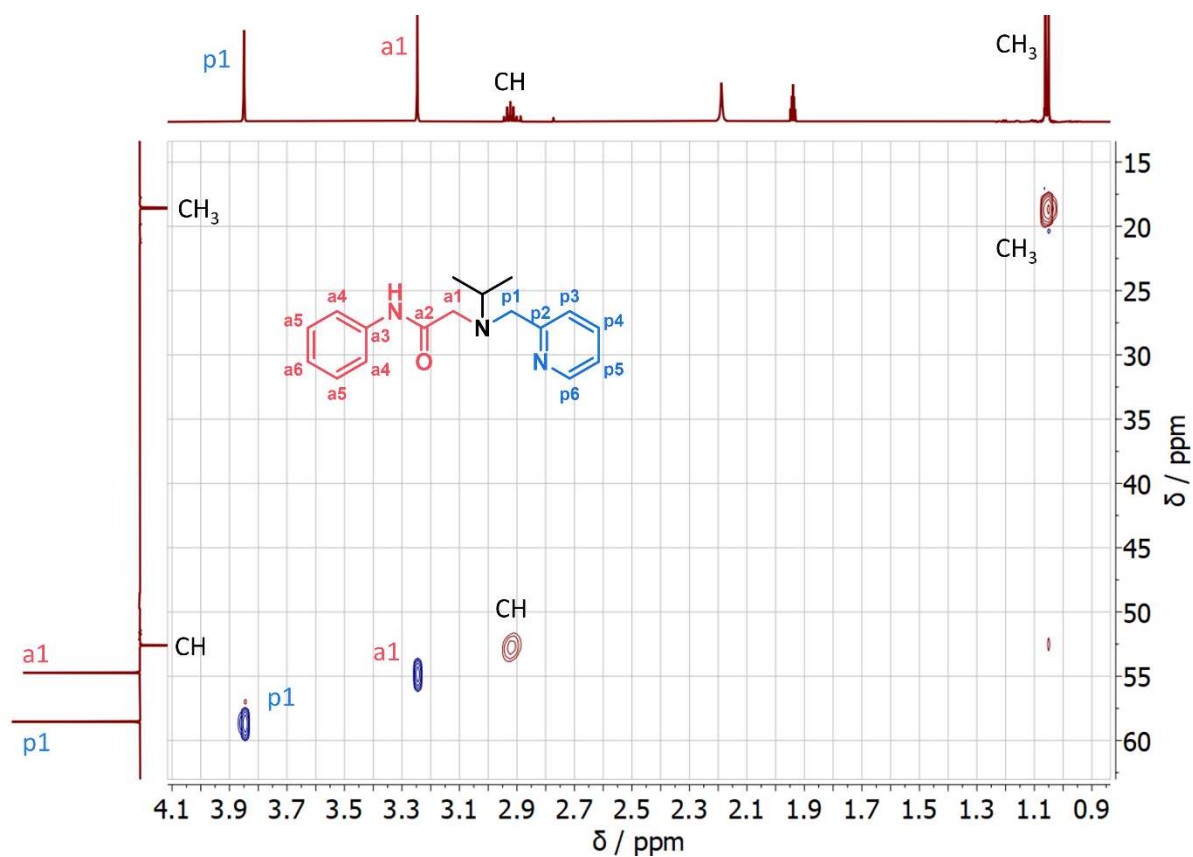

**Figure S16**  $^1\text{H}$ - $^{13}\text{C}$  HSQC NMR ( $\text{CD}_3\text{CN}$ , aliphatic region) of ligand L

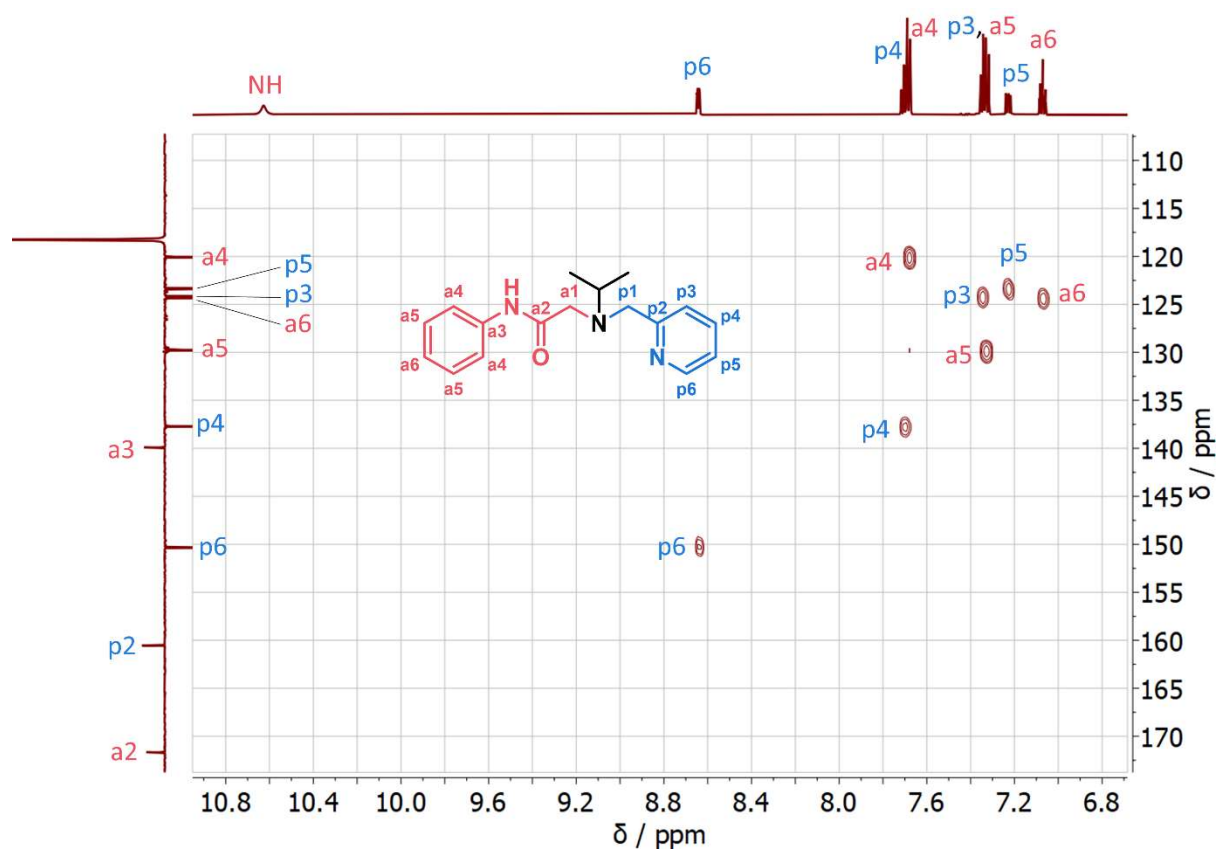

**Figure S17.**  $^1\text{H}$ - $^{13}\text{C}$  HSQC NMR ( $\text{CD}_3\text{CN}$ , aromatic region) of ligand L

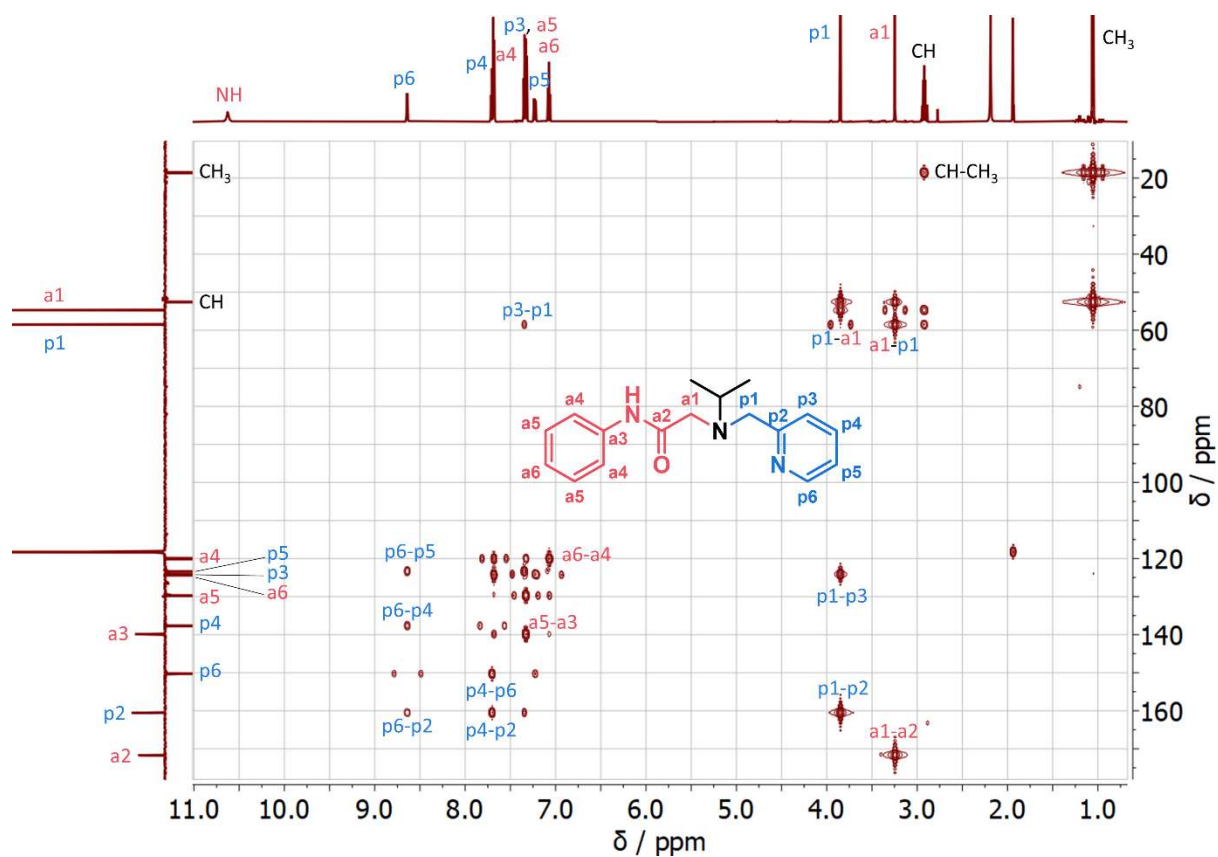

**Figure S18.**  $^1\text{H}$ - $^{13}\text{C}$  HMBC NMR ( $\text{CD}_3\text{CN}$ ) of ligand L

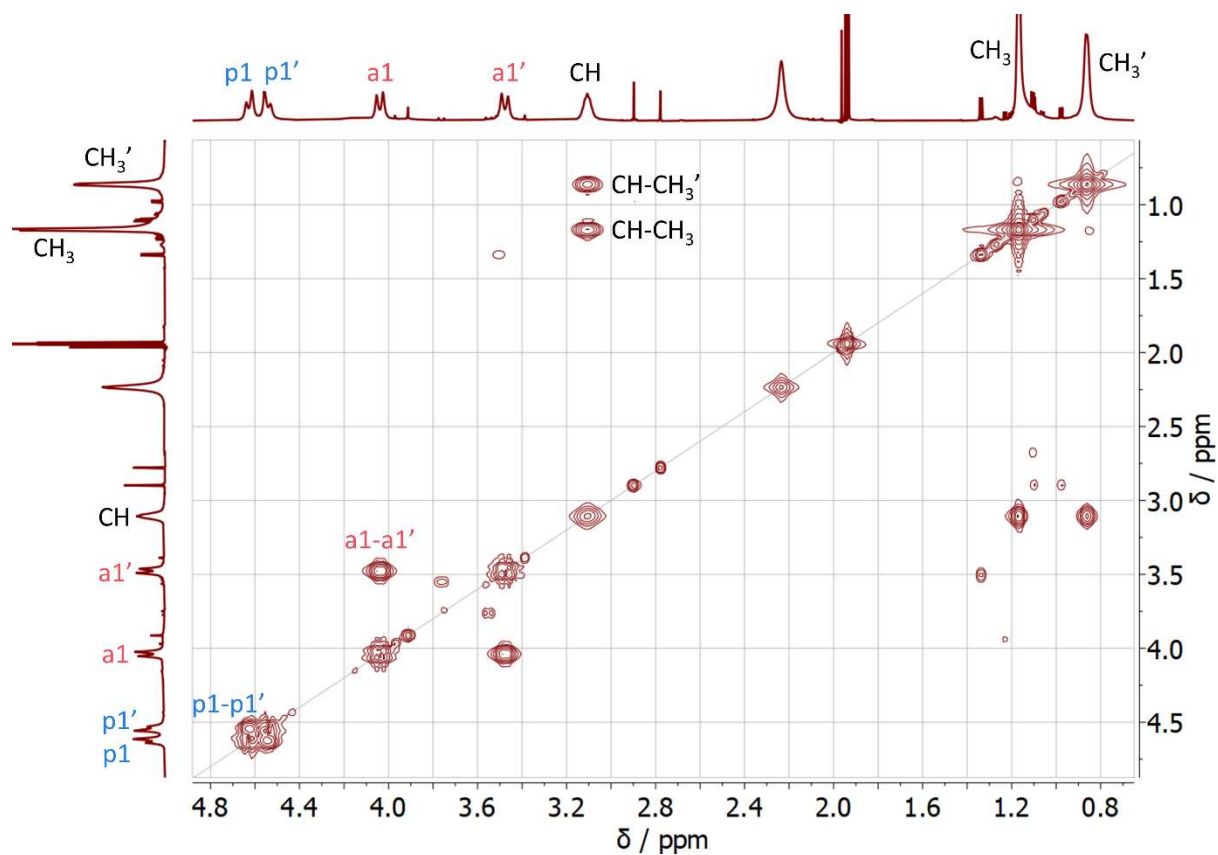

**Figure S19.**  $^1\text{H}$ - $^1\text{H}$  COSY NMR (room temperature,  $\text{CD}_3\text{CN}$ , aliphatic region) of  $[\text{Zn}(\text{L})_2](\text{CF}_3\text{SO}_3)_2$

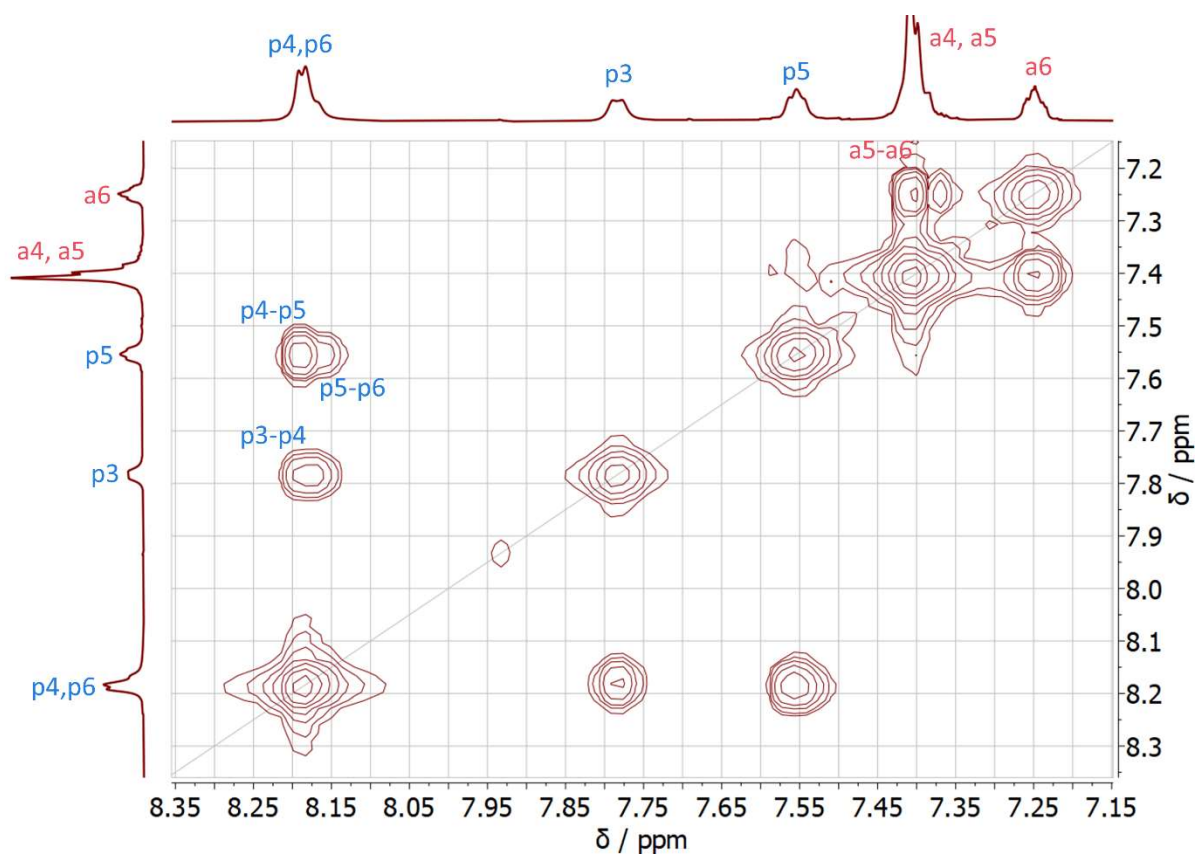

**Figure S20.**  $^1\text{H}$ - $^1\text{H}$  COSY NMR (room temperature,  $\text{CD}_3\text{CN}$ , aromatic region) of  $[\text{Zn}(\text{L})_2](\text{CF}_3\text{SO}_3)_2$

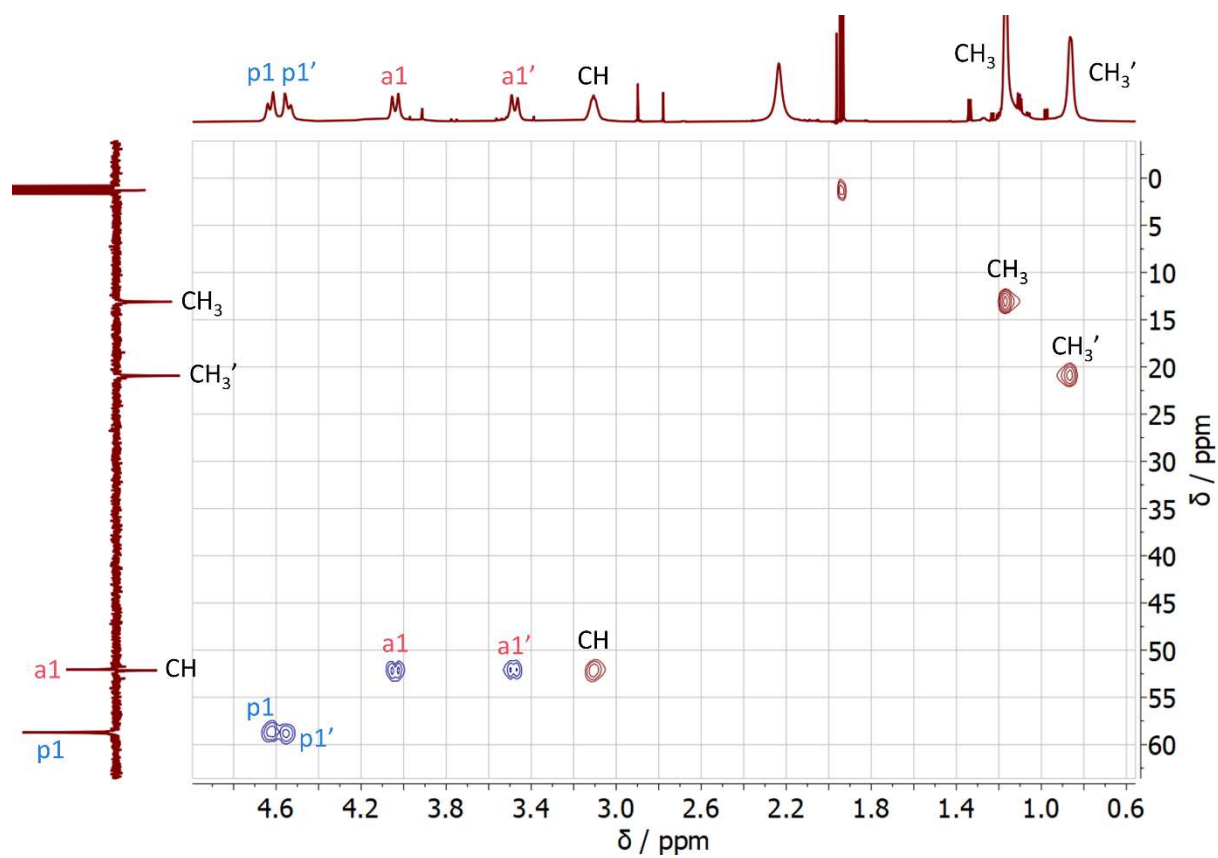

**Figure S21.**  $^1\text{H}$ - $^{13}\text{C}$  HSQC NMR (room temperature,  $\text{CD}_3\text{CN}$ , aliphatic region) of  $[\text{Zn}(\text{L})_2](\text{CF}_3\text{SO}_3)_2$

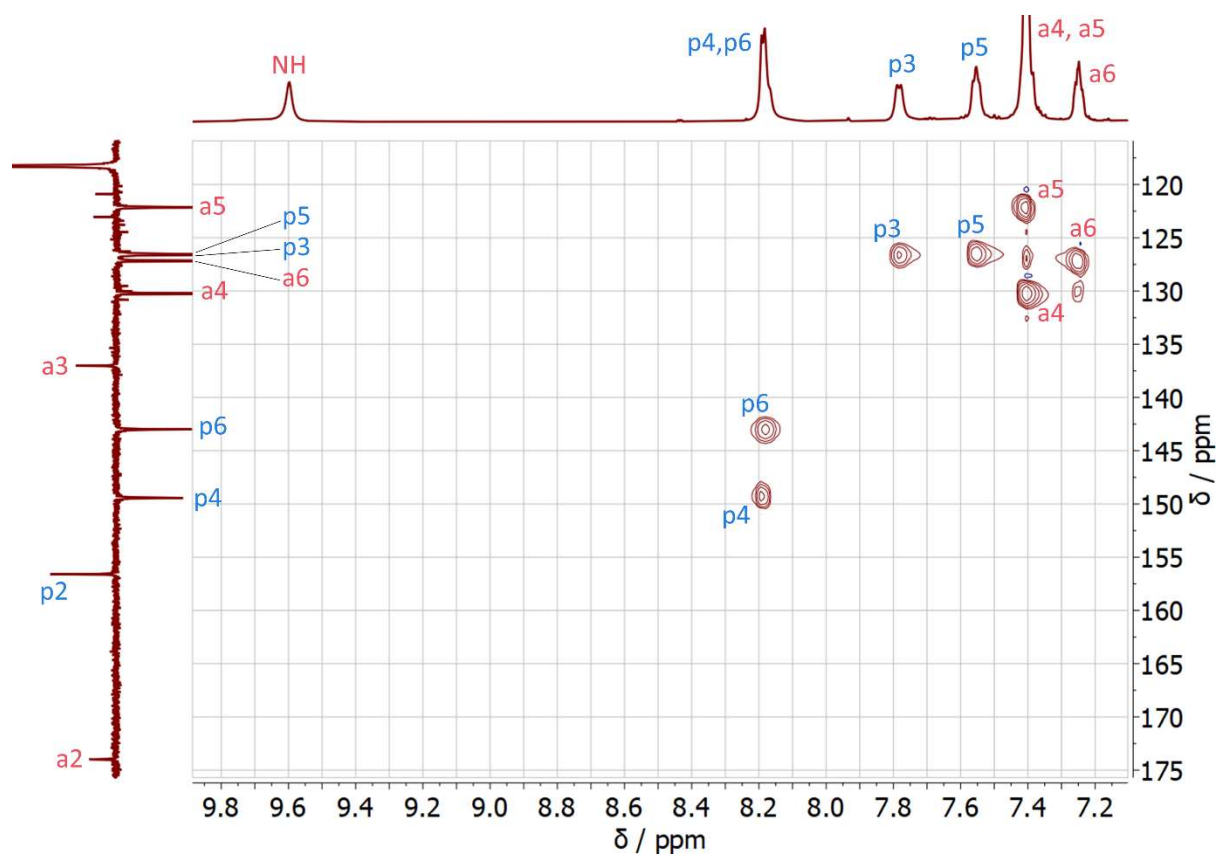

**Figure S22.**  $^1\text{H}$ - $^{13}\text{C}$  HSQC NMR (room temperature,  $\text{CD}_3\text{CN}$ , aromatic region) of  $[\text{Zn}(\text{L})_2](\text{CF}_3\text{SO}_3)_2$

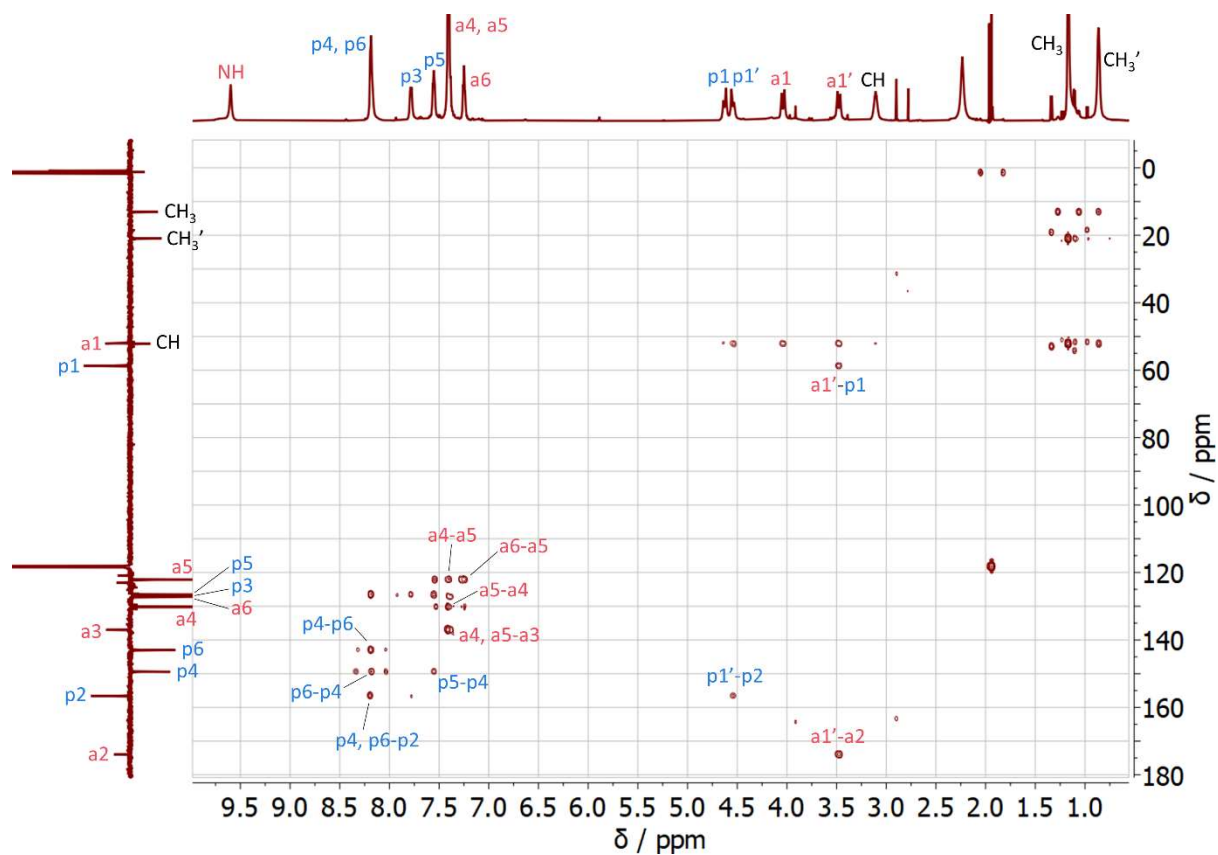

**Figure S23.**  $^1\text{H}$ - $^{13}\text{C}$  HMBC NMR (room temperature,  $\text{CD}_3\text{CN}$ ) of  $[\text{Zn}(\text{L})_2](\text{CF}_3\text{SO}_3)_2$



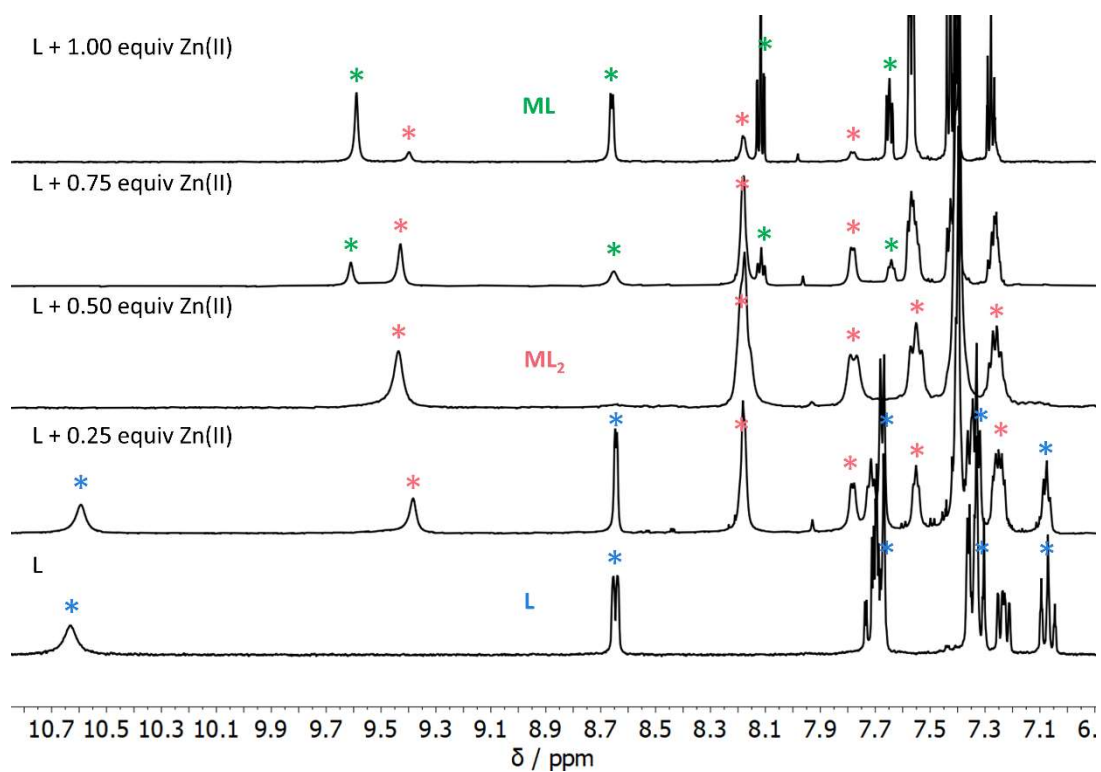

**Figure S24.**  $^1\text{H}$  NMR ( $\text{CD}_3\text{CN}$ ) spectra (aromatic region) of **L** with different additions of  $\text{Zn}(\text{CF}_3\text{SO}_3)_2$

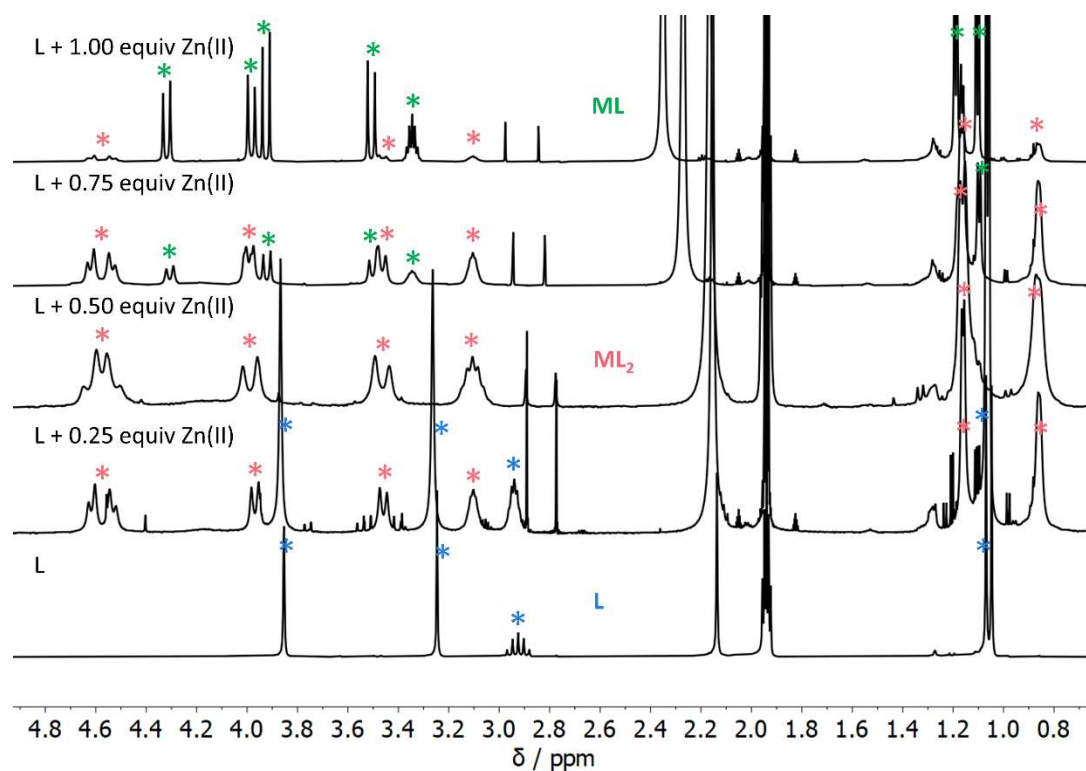

**Figure S25.**  $^1\text{H}$  NMR ( $\text{CD}_3\text{CN}$ ) spectra (aliphatic region) of **L** with different additions of  $\text{Zn}(\text{CF}_3\text{SO}_3)_2$

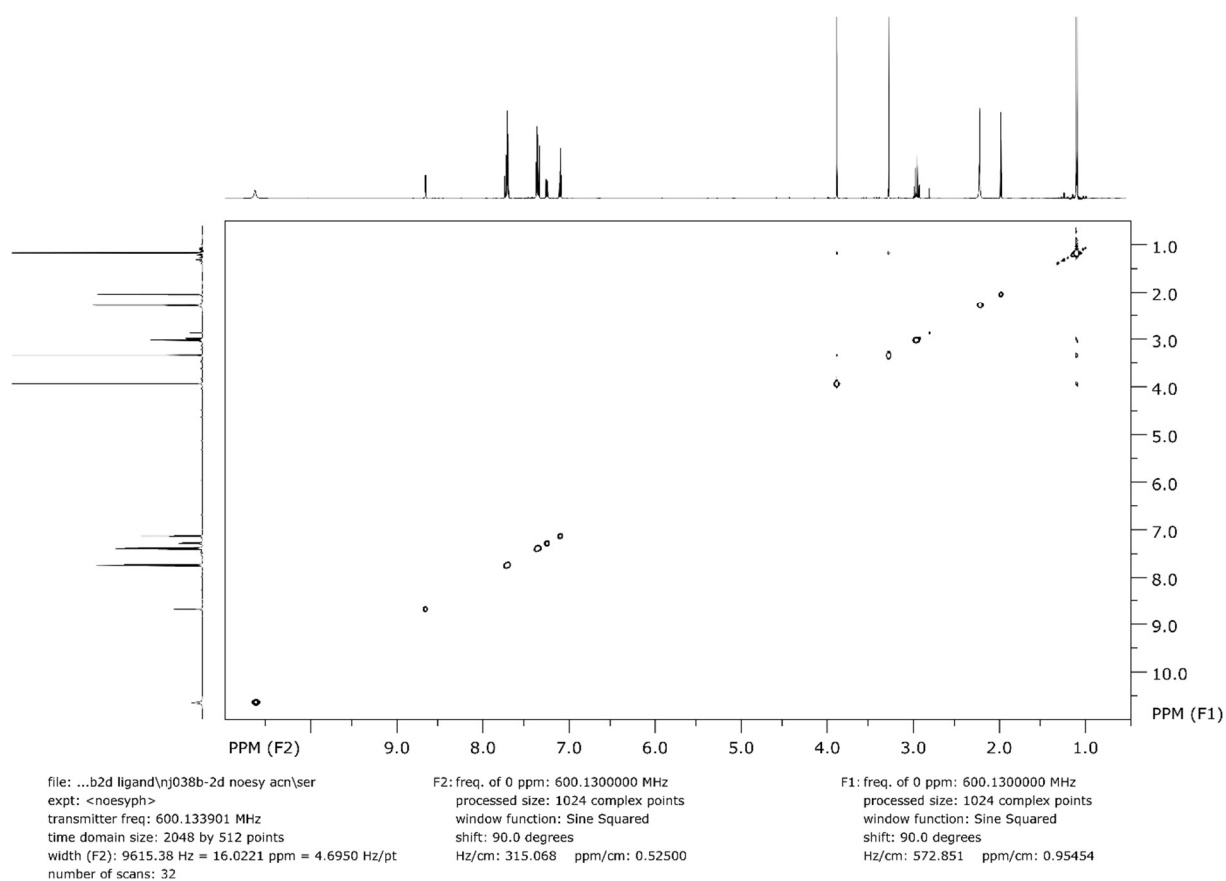

**Figure S26.**  $^1\text{H}$  NOESY spectrum of **L** with parameters of measurement. The same parameters are used for NOESY spectra of  $[\text{Zn}(\text{L})_2]^{2+}$  (Figure 5b of the manuscript).



## DFT-NMR calculations and correlations with experiment

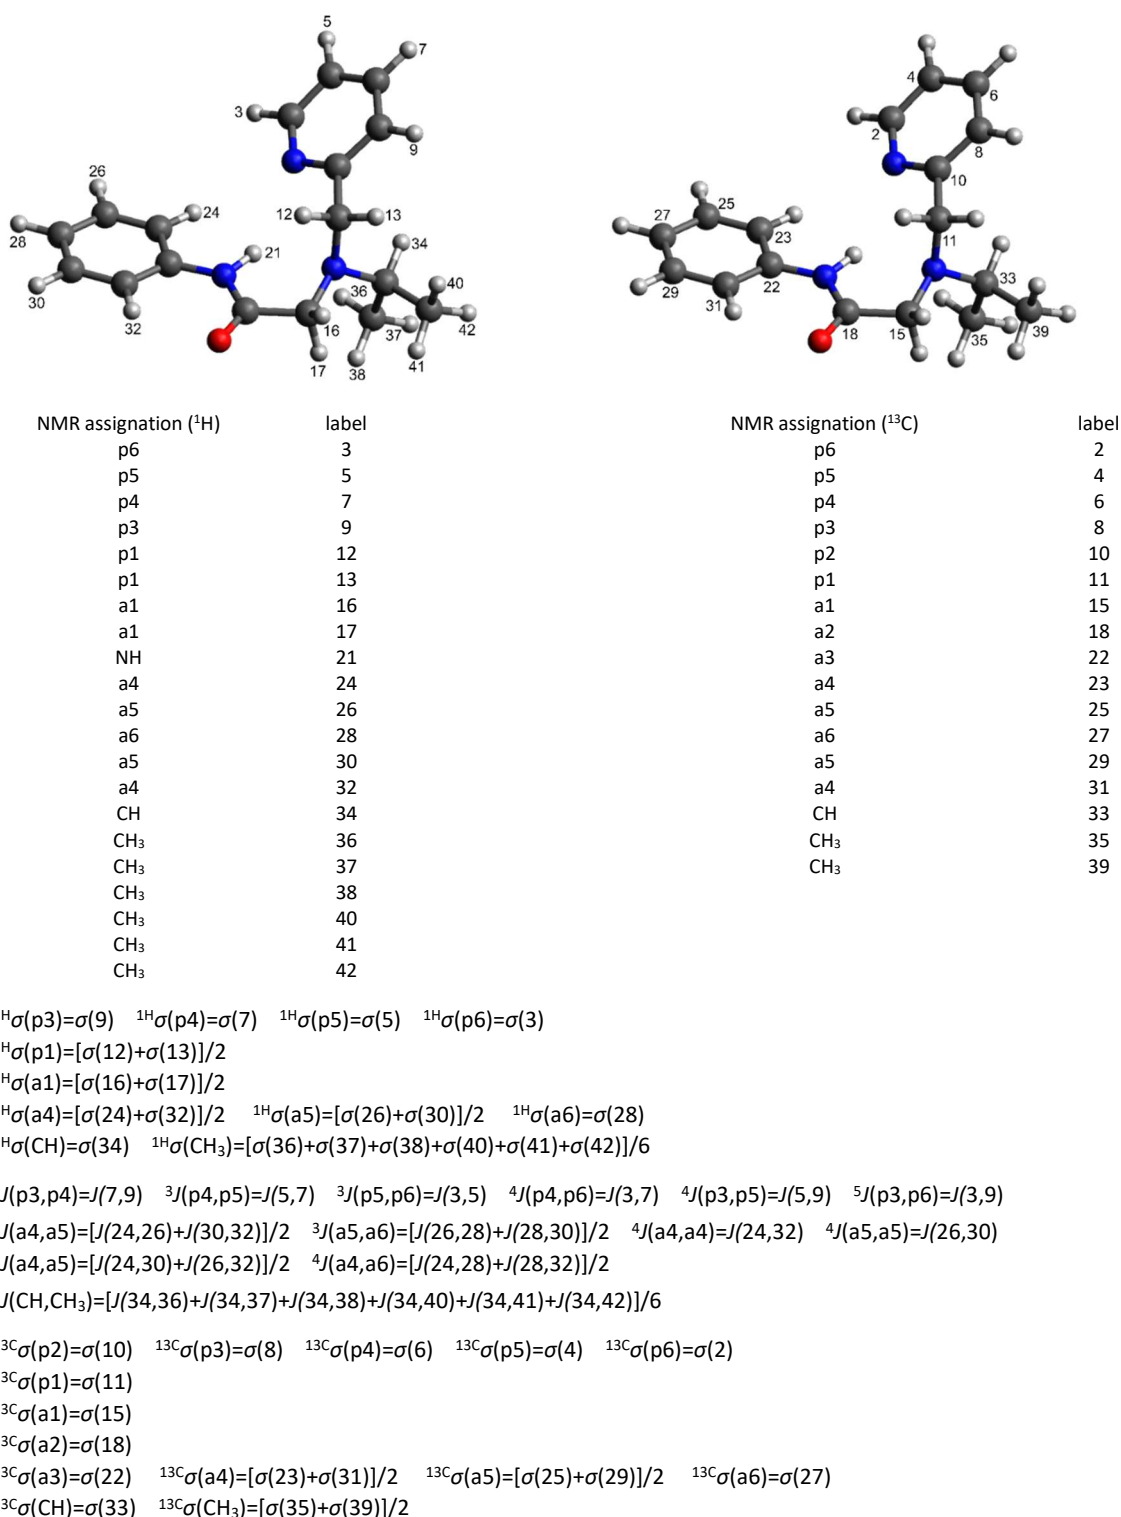

**Figure S27.** Atom labels used in DFT calculations for **L** (left - H atoms, right - C atoms) shown on the structural model of second conformer (Figure S30) with table of assignments used in the interpretation of the NMR spectra. Formulas are definitions for averaged  $^1\text{H}$  shieldings ( $^1\text{H}\sigma$ ) used in  $^1\text{H}$  correlation calculations (Figures S29-S38) and for averaged  $J$  couplings used in  $J$  coupling correlation diagrams (Figures S42-S51) and in spin systems of Table 2 of the manuscript (spin systems for **L**). Definitions for averaged  $^{13}\text{C}$  shieldings ( $^{13}\text{C}\sigma$ ) used in  $^{13}\text{C}$  correlation calculations are also specified (Figures S29-S38).

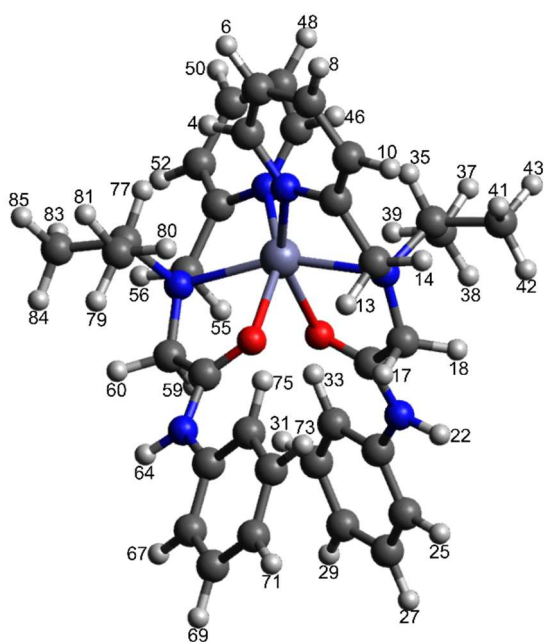

| NMR assignment ( $^1\text{H}$ ) | label<br>(first ligand) | label<br>(second ligand) |
|---------------------------------|-------------------------|--------------------------|
| p6                              | 4                       | 46                       |
| p5                              | 6                       | 48                       |
| p4                              | 8                       | 50                       |
| p3                              | 10                      | 52                       |
| p1                              | 13                      | 55                       |
| p1'                             | 14                      | 56                       |
| a1'                             | 17                      | 59                       |
| a1                              | 18                      | 60                       |
| NH                              | 22                      | 64                       |
| a4                              | 25                      | 67                       |
| a5                              | 27                      | 69                       |
| a6                              | 29                      | 71                       |
| a5                              | 31                      | 73                       |
| a4                              | 33                      | 75                       |
| CH                              | 35                      | 77                       |
| C'H <sub>3</sub>                | 37                      | 79                       |
| C'H <sub>3</sub>                | 38                      | 80                       |
| C'H <sub>3</sub>                | 39                      | 81                       |
| CH <sub>3</sub>                 | 41                      | 83                       |
| CH <sub>3</sub>                 | 42                      | 84                       |
| CH <sub>3</sub>                 | 43                      | 85                       |

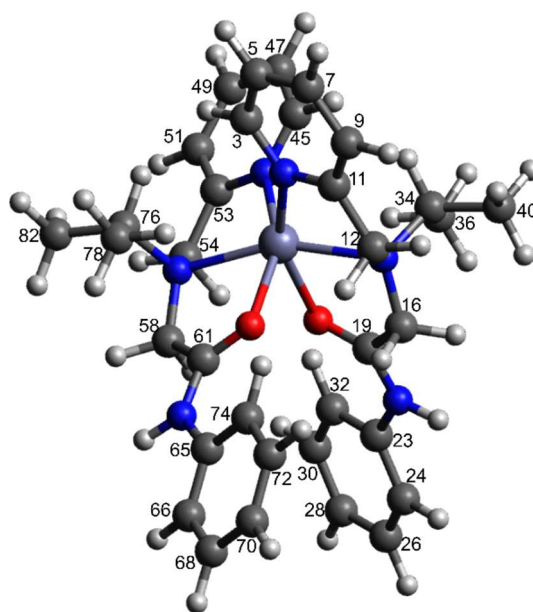

| NMR assignment ( $^{13}\text{C}$ ) | label<br>(first ligand) | label<br>(second ligand) |
|------------------------------------|-------------------------|--------------------------|
| p6                                 | 3                       | 45                       |
| p5                                 | 5                       | 47                       |
| p4                                 | 7                       | 49                       |
| p3                                 | 9                       | 51                       |
| p2                                 | 11                      | 53                       |
| p1                                 | 12                      | 54                       |
| a1                                 | 16                      | 58                       |
| a2                                 | 19                      | 61                       |
| a3                                 | 23                      | 65                       |
| a4                                 | 24                      | 66                       |
| a5                                 | 26                      | 68                       |
| a6                                 | 28                      | 70                       |
| a5                                 | 30                      | 72                       |
| a4                                 | 32                      | 74                       |
| CH                                 | 34                      | 76                       |
| C'H <sub>3</sub>                   | 36                      | 78                       |
| CH <sub>3</sub>                    | 40                      | 82                       |

(A)

$$^1\text{H}\sigma(\text{p3})=[\sigma(10)+\sigma(52)]/2 \quad ^1\text{H}\sigma(\text{p4})=[\sigma(8)+\sigma(50)]/2 \quad ^1\text{H}\sigma(\text{p5})=[\sigma(6)+\sigma(48)]/2 \quad ^1\text{H}\sigma(\text{p6})=[\sigma(4)+\sigma(46)]/2$$

$$^1\text{H}\sigma(\text{p1})=[\sigma(13)+\sigma(55)]/2$$

$$^1\text{H}\sigma(\text{p1}')=[\sigma(14)+\sigma(56)]/2$$

$$^1\text{H}\sigma(\text{a1}')=[\sigma(17)+\sigma(59)]/2$$

$$^1\text{H}\sigma(\text{a1})=[\sigma(18)+\sigma(60)]/2$$

$$^1\text{H}\sigma(\text{a4})=[\sigma(25)+\sigma(33)+\sigma(67)+\sigma(75)]/4 \quad ^1\text{H}\sigma(\text{a5})=[\sigma(27)+\sigma(31)+\sigma(69)+\sigma(73)]/4 \quad ^1\text{H}\sigma(\text{a6})=[\sigma(29)+\sigma(71)]/2$$

$$^1\text{H}\sigma(\text{CH})=[\sigma(35)+\sigma(77)]/2 \quad ^1\text{H}\sigma(\text{C'H}_3)=[\sigma(37)+\sigma(38)+\sigma(39)+\sigma(79)+\sigma(80)+\sigma(81)]/6$$

$$^1\text{H}\sigma(\text{CH}_3)=[\sigma(41)+\sigma(42)+\sigma(43)+\sigma(83)+\sigma(84)+\sigma(85)]/6$$

$$^3J(\text{p3},\text{p4})=[J(8,10)+J(50,52)]/2 \quad ^3J(\text{p4},\text{p5})=[J(6,8)+J(48,50)]/2 \quad ^3J(\text{p5},\text{p6})=[J(4,6)+J(46,48)]/2 \quad ^4J(\text{p4},\text{p6})=[J(4,8)+J(46,50)]/2$$

$$^4J(\text{p3},\text{p5})=[J(6,10)+J(48,52)]/2 \quad ^5J(\text{p3},\text{p6})=[J(4,10)+J(46,52)]/2$$

$$^2J(\text{p1},\text{p1}')=[J(13,14)+J(55,56)]/2$$

$$^2J(\text{a1},\text{a1}')=[J(17,18)+J(59,60)]/2$$

$$^3J(\text{a4},\text{a5})=[J(25,27)+J(31,33)+J(67,69)+J(73,75)]/4 \quad ^3J(\text{a5},\text{a6})=[J(27,29)+J(29,31)+J(69,71)+J(71,73)]/4$$

$$\begin{aligned}
^4J(a4,a4) &= [J(25,33) + J(67,75)]/2 & ^4J(a5,a5) &= [J(27,31) + J(69,73)]/2 \\
^5J(a4,a5) &= [J(25,31) + J(27,33) + J(67,73) + J(69,75)]/4 & ^4J(a4,a6) &= [J(25,29) + J(29,33) + J(67,71) + J(71,75)]/4 \\
^3J(CH,C'H'_3) &= [J(35,37) + J(35,38) + J(35,39) + J(77,79) + J(77,80) + J(77,81)]/6 \\
^3J(CH,CH_3) &= [J(35,41) + J(35,42) + J(35,43) + J(77,83) + J(77,84) + J(77,85)]/6 \\
^4J(CH_3,C'H'_3) &= [J(37,41) + J(37,42) + J(37,43) + J(38,41) + J(38,42) + J(38,43) + J(39,41) + J(39,42) + J(39,43) + \\
&\quad J(79,83) + J(79,84) + J(79,85) + J(80,83) + J(80,84) + J(80,85) + J(81,83) + J(81,84) + J(81,85)]/18 \\
^{13}C\sigma(p2) &= [\sigma(11) + \sigma(53)]/2 & ^{13}C\sigma(p3) &= [\sigma(9) + \sigma(51)]/2 & ^{13}C\sigma(p4) &= [\sigma(7) + \sigma(49)]/2 & ^{13}C\sigma(p5) &= [\sigma(5) + \sigma(47)]/2 \\
^{13}C\sigma(p6) &= [\sigma(3) + \sigma(45)]/2 \\
^{13}C\sigma(p1) &= [\sigma(12) + \sigma(54)]/2 \\
^{13}C\sigma(a1) &= [\sigma(16) + \sigma(58)]/2 \\
^{13}C\sigma(a2) &= [\sigma(19) + \sigma(61)]/2 \\
^{13}C\sigma(a3) &= [\sigma(23) + \sigma(65)]/2 & ^{13}C\sigma(a4) &= [\sigma(24) + \sigma(32) + \sigma(66) + \sigma(74)]/4 & ^{13}C\sigma(a5) &= [\sigma(26) + \sigma(30) + \sigma(68) + \sigma(72)]/4 \\
^{13}C\sigma(a6) &= [\sigma(28) + \sigma(70)]/2 \\
^{13}C\sigma(CH) &= [\sigma(34) + \sigma(76)]/2 \\
^{13}C\sigma(CH_3) &= [\sigma(36) + \sigma(78)]/2 \\
^{13}C\sigma(CH_3) &= [\sigma(40) + \sigma(82)]/2
\end{aligned}$$

(B)

**Figure S28 (A).** Atom labels used in DFT calculations for  $[Zn(L)_2]^{2+}$  (left - H atoms, right - C atoms) shown on the structural model of first conformer (Figure S39) with table of associated assignments used in the interpretation of the NMR spectra. (B). Definitions for averaged  $^1H$  shieldings ( $^{1H}\sigma$ ) used in  $^1H$  correlation calculations (Figures S39-S41) and averaged  $J$  couplings used in  $J$  coupling correlation diagrams (Figures S52-S54) and in spin systems of Table 2 of the manuscript (spin systems for  $[Zn(L)_2]^{2+}$ ). Definitions for averaged  $^{13}C$  shieldings ( $^{13}C\sigma$ ) used in  $^{13}C$  correlation calculations are also specified (Figures S39-S41).

## L - Conformer 1

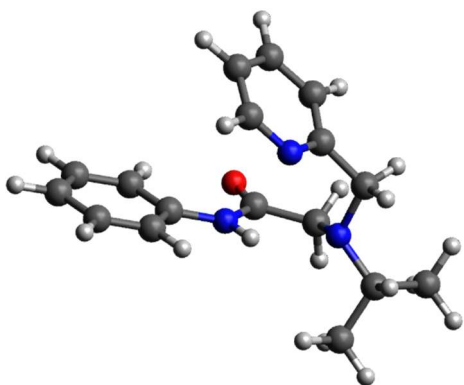

| Free Energy (G)<br>[kcal/mol] | population [%]<br>293 K |
|-------------------------------|-------------------------|
| 0                             | 0.211                   |

| assign. | $^1\text{H}\sigma$ | $^1\text{H}\delta^o$ | $^1\text{H}\delta^c$ |
|---------|--------------------|----------------------|----------------------|
| p6      | 22,846             | 8,642                | 8,525961             |
| p5      | 24,51              | 7,228                | 6,867785             |
| p4      | 23,683             | 7,704                | 7,691891             |
| p3      | 23,919             | 7,348                | 7,456717             |
| p1      | 27,5645            | 3,85                 | 3,823976             |
| a1      | 28,3225            | 3,247                | 3,068629             |
| a4      | 23,734             | 7,683                | 7,641069             |
| a5      | 23,8695            | 7,329                | 7,506043             |
| a6      | 24,162             | 7,071                | 7,214567             |
| CH      | 28,048             | 2,923                | 3,342168             |
| CH3     | 30,46783           | 1,056                | 0,930804             |

MAE = 0,15531

### $^1\text{H}$ correlation

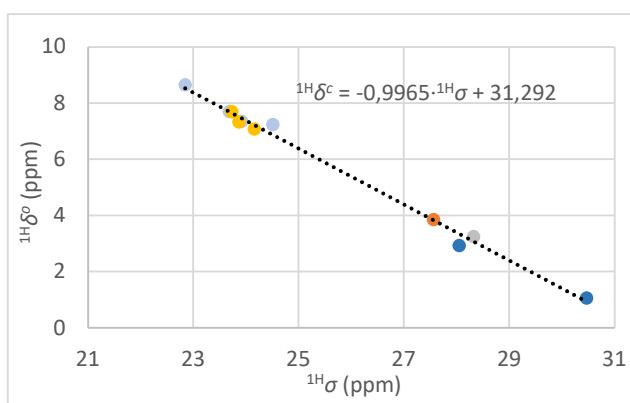

| assign. | $^{13}\text{C}\sigma$ | $^{13}\text{C}\delta^o$ | $^{13}\text{C}\delta^c$ |
|---------|-----------------------|-------------------------|-------------------------|
| p6      | 28,495                | 150,33                  | 152,4071                |
| p5      | 60,078                | 123,37                  | 121,7242                |
| p4      | 43,585                | 137,71                  | 137,7472                |
| p3      | 57,346                | 124,16                  | 124,3784                |
| p2      | 18,83                 | 160,54                  | 161,7967                |
| p1      | 119,212               | 58,54                   | 64,27554                |
| a1      | 132,061               | 54,72                   | 51,79274                |
| a2      | 8,163                 | 171,67                  | 172,1596                |
| a3      | 42,077                | 139,91                  | 139,2122                |
| a4      | 65,6375               | 120,07                  | 116,3232                |
| a5      | 52,3525               | 129,76                  | 129,2295                |
| a6      | 60,029                | 124,32                  | 121,7718                |
| CH      | 125,832               | 52,59                   | 57,84421                |
| CH3     | 169,326               | 18,58                   | 15,58979                |

MAE = 2,15394

### $^{13}\text{C}$ correlation

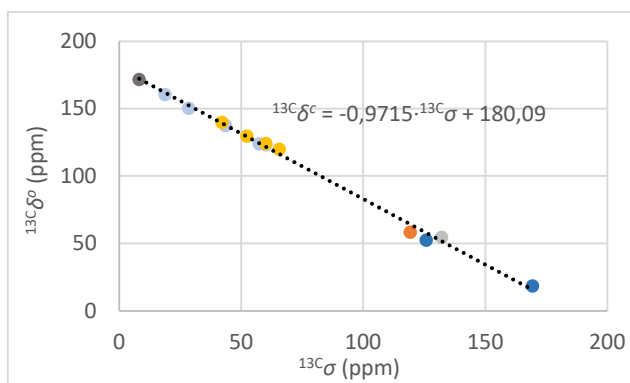

**Figure S29.** Lowest energy conformer of **L** ( $G=0$ ), with its calculated population at 293 K. In tables are data for the DFT calculated shieldings ( $^1\text{H}\sigma$  or  $^{13}\text{C}\sigma$ ) and observed chemical shifts ( $^1\text{H}\delta^o$  or  $^{13}\text{C}\delta^o$ ) and in diagrams are linear regression equations used for evaluation of the calculated chemical shifts ( $^1\text{H}\delta^c$  or  $^{13}\text{C}\delta^c$ ) with Mean Absolute Error (MAE) for this conformer.

## L - Conformer 2

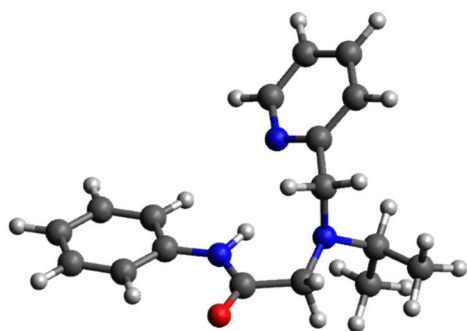

| Free Energy (G)<br>[kcal/mol] | population [%]<br>293 K |
|-------------------------------|-------------------------|
| 0.002                         | 0.210                   |

| assign. | $^1\text{H}\sigma$ | $^1\text{H}\delta^o$ | $^1\text{H}\delta^c$ |
|---------|--------------------|----------------------|----------------------|
| p6      | 22,264             | 8,642                | 8,611682             |
| p5      | 23,827             | 7,228                | 7,219674             |
| p4      | 23,375             | 7,704                | 7,622225             |
| p3      | 23,823             | 7,348                | 7,223236             |
| p1      | 27,7365            | 3,85                 | 3,737873             |
| a1      | 28,2035            | 3,247                | 3,321963             |
| a4      | 23,04              | 7,683                | 7,920576             |
| a5      | 23,6405            | 7,329                | 7,385771             |
| a6      | 24,013             | 7,071                | 7,054022             |
| CH      | 28,784             | 2,923                | 2,80497              |
| CH3     | 30,61533           | 1,056                | 1,173984             |

MAE = 0,08906

### $^1\text{H}$ correlation

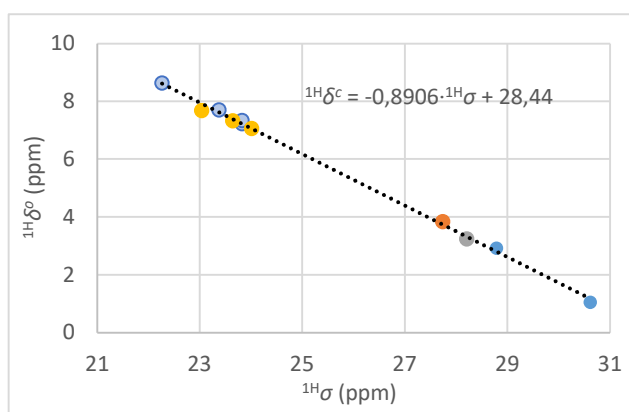

| assign. | $^{13}\text{C}\sigma$ | $^{13}\text{C}\delta^o$ | $^{13}\text{C}\delta^c$ |
|---------|-----------------------|-------------------------|-------------------------|
| p6      | 29,907                | 150,33                  | 150,6613                |
| p5      | 59,486                | 123,37                  | 122,9102                |
| p4      | 43,546                | 137,71                  | 137,8651                |
| p3      | 57,474                | 124,16                  | 124,7979                |
| p2      | 17,513                | 160,54                  | 162,2893                |
| p1      | 126,658               | 58,54                   | 59,88946                |
| a1      | 132,662               | 54,72                   | 54,25651                |
| a2      | 8,021                 | 171,67                  | 171,1947                |
| a3      | 40,906                | 139,91                  | 140,342                 |
| a4      | 64,5425               | 120,07                  | 118,1662                |
| a5      | 51,969                | 129,76                  | 129,9627                |
| a6      | 59,779                | 124,32                  | 122,6353                |
| CH      | 134,818               | 52,59                   | 52,23375                |
| CH3     | 170,185               | 18,58                   | 19,05243                |

MAE = 0,76239

### $^{13}\text{C}$ correlation

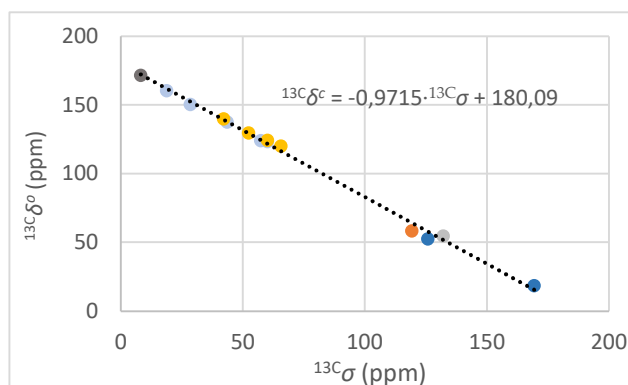

**Figure S30.** 2<sup>nd</sup> conformer in free energy scale for **L**, with its calculated population at 293 K. In tables are data for the DFT calculated shieldings ( $^1\text{H}\sigma$  or  $^{13}\text{C}\sigma$ ) and observed chemical shifts ( $^1\text{H}\delta^o$  or  $^{13}\text{C}\delta^o$ ) and in diagrams are linear regression equations used for evaluation of the calculated chemical shifts ( $^1\text{H}\delta^c$  or  $^{13}\text{C}\delta^c$ ) with Mean Absolute Error (MAE) for this conformer.

## L - Conformer 3

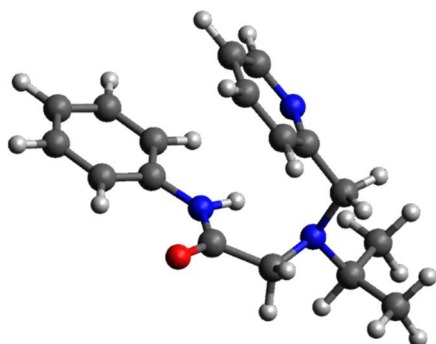

| Free Energy (G)<br>[kcal/mol] | population [%]<br>293 K |
|-------------------------------|-------------------------|
| 0.282                         | 0.130                   |

### $^1\text{H}$ correlation

| assign.       | $^1\text{H}\sigma$ | $^1\text{H}\delta^o$ | $^1\text{H}\delta^c$ |
|---------------|--------------------|----------------------|----------------------|
| p6            | 22,856             | 8,642                | 8,55171              |
| p5            | 24,548             | 7,228                | 6,85717              |
| p4            | 23,696             | 7,704                | 7,71045              |
| p3            | 23,909             | 7,348                | 7,497136             |
| p1            | 27,7415            | 3,85                 | 3,6588877            |
| a1            | 28,154             | 3,247                | 3,24576              |
| a4            | 23,76              | 7,683                | 7,6463               |
| a5            | 23,8795            | 7,329                | 7,5266807            |
| a6            | 24,163             | 7,071                | 7,242755             |
| CH            | 28,367             | 2,923                | 3,032449             |
| CH3           | 30,28617           | 1,056                | 1,11040408           |
| MAE = 0,12536 |                    |                      |                      |

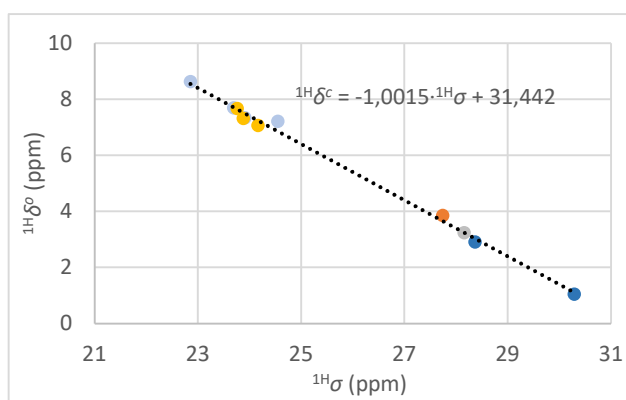

### $^{13}\text{C}$ correlation

| assign.       | $^{13}\text{C}\sigma$ | $^{13}\text{C}\delta^o$ | $^{13}\text{C}\delta^c$ |
|---------------|-----------------------|-------------------------|-------------------------|
| p6            | 28,273                | 150,33                  | 152,7259698             |
| p5            | 60,315                | 123,37                  | 121,408119              |
| p4            | 43,621                | 137,71                  | 137,7248346             |
| p3            | 57,04                 | 124,16                  | 124,609104              |
| p2            | 18,264                | 160,54                  | 162,5087664             |
| p1            | 129,152               | 58,54                   | 54,1268352              |
| a1            | 121,786               | 54,72                   | 61,3263636              |
| a2            | 8,941                 | 171,67                  | 171,6210666             |
| a3            | 42,156                | 139,91                  | 139,1567256             |
| a4            | 65,6255               | 120,07                  | 116,2176363             |
| a5            | 52,4005               | 129,76                  | 129,1437513             |
| a6            | 60,021                | 124,32                  | 121,6954746             |
| CH            | 124,892               | 52,59                   | 58,2905592              |
| CH3           | 168,4675              | 18,58                   | 15,6998655              |
| MAE = 2,44901 |                       |                         |                         |

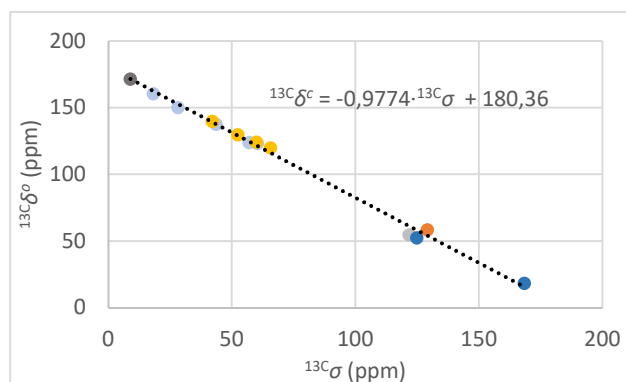

**Figure S31.** 3<sup>rd</sup> conformer in free energy scale for **L**, with its calculated population at 293 K. In tables are data for the DFT calculated shieldings ( $^1\text{H}\sigma$  or  $^{13}\text{C}\sigma$ ) and observed chemical shifts ( $^1\text{H}\delta^o$  or  $^{13}\text{C}\delta^o$ ) and in diagrams are linear regression equations used for evaluation of the calculated chemical shifts ( $^1\text{H}\delta^c$  or  $^{13}\text{C}\delta^c$ ) with Mean Absolute Error (MAE) for this conformer.

## L - Conformer 4

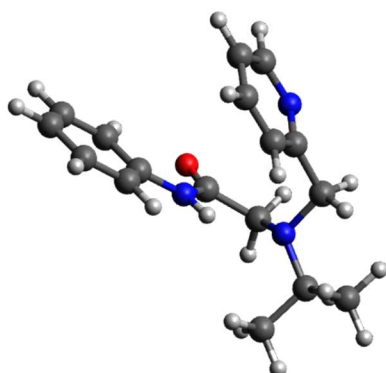

| Free Energy (G)<br>[kcal/mol] | population [%]<br>293 K |
|-------------------------------|-------------------------|
| 0.348                         | 0.116                   |

| assign. | $^1\text{H}\sigma$ | $^1\text{H}\delta^o$ | $^1\text{H}\delta^c$ |
|---------|--------------------|----------------------|----------------------|
| p6      | 22,928             | 8,642                | 8,429275             |
| p5      | 24,533             | 7,228                | 6,833745             |
| p4      | 23,754             | 7,704                | 7,608149             |
| p3      | 23,548             | 7,348                | 7,812933             |
| p1      | 27,562             | 3,85                 | 3,822616             |
| a1      | 28,291             | 3,247                | 3,097917             |
| a4      | 23,8135            | 7,683                | 7,549                |
| a5      | 23,901             | 7,329                | 7,462016             |
| a6      | 24,174             | 7,071                | 7,190627             |
| CH      | 28,052             | 2,923                | 3,335507             |
| CH3     | 30,47183           | 1,056                | 0,92995              |

MAE = 0,206312

### $^1\text{H}$ correlation

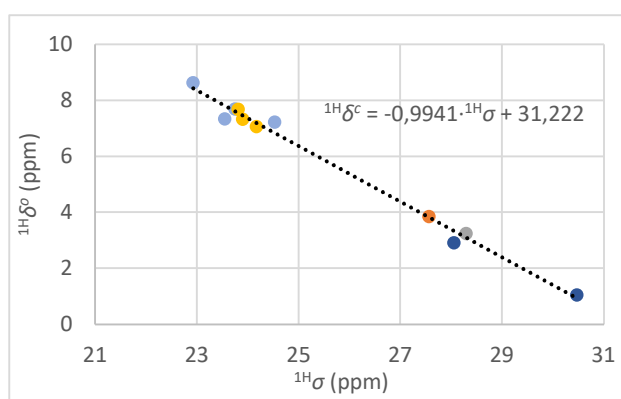

| assign. | $^{13}\text{C}\sigma$ | $^{13}\text{C}\delta^o$ | $^{13}\text{C}\delta^c$ |
|---------|-----------------------|-------------------------|-------------------------|
| p6      | 30,883                | 150,33                  | 150,1054                |
| p5      | 60,086                | 123,37                  | 121,6763                |
| p4      | 42,926                | 137,71                  | 138,3815                |
| p3      | 55,665                | 124,16                  | 125,9801                |
| p2      | 18,165                | 160,54                  | 162,4864                |
| p1      | 119,072               | 58,54                   | 64,25341                |
| a1      | 132,065               | 54,72                   | 51,60472                |
| a2      | 8,093                 | 171,67                  | 172,2915                |
| a3      | 42,266                | 139,91                  | 139,024                 |
| a4      | 65,816                | 120,07                  | 116,0981                |
| a5      | 52,449                | 129,76                  | 129,1109                |
| a6      | 60,097                | 124,32                  | 121,6656                |
| CH      | 125,402               | 52,59                   | 58,09115                |
| CH3     | 169,2305              | 18,58                   | 15,42411                |

MAE = 2,330351

### $^{13}\text{C}$ correlation

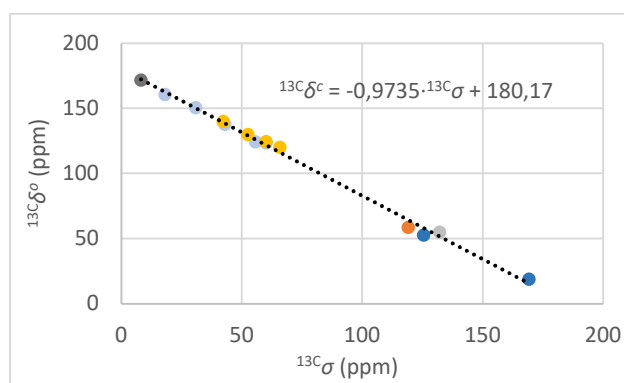

**Figure S32.** 4<sup>th</sup> conformer in free energy scale for **L**, with its calculated population at 293 K. In tables are data for the DFT calculated shieldings ( $^1\text{H}\sigma$  or  $^{13}\text{C}\sigma$ ) and observed chemical shifts ( $^1\text{H}\delta^o$  or  $^{13}\text{C}\delta^o$ ) and in diagrams are linear regression equations used for evaluation of the calculated chemical shifts ( $^1\text{H}\delta^c$  or  $^{13}\text{C}\delta^c$ ) with Mean Absolute Error (MAE) for this conformer.

## L - Conformer 5

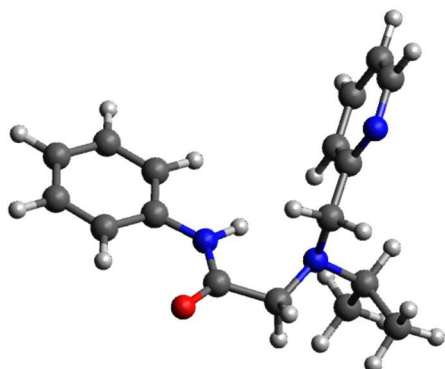

| Free Energy (G)<br>[kcal/mol] | population [%]<br>293 K |
|-------------------------------|-------------------------|
| 0.409                         | 0.104                   |

| assign. | $^1\text{H}\sigma$ | $^1\text{H}\delta^o$ | $^1\text{H}\delta^c$ |
|---------|--------------------|----------------------|----------------------|
| p6      | 22,603             | 8,642                | 8,321118             |
| p5      | 23,921             | 7,228                | 7,116598             |
| p4      | 23,191             | 7,704                | 7,783745             |
| p3      | 23,02              | 7,348                | 7,940022             |
| p1      | 27,5245            | 3,85                 | 3,823359             |
| a1      | 28,1955            | 3,247                | 3,210133             |
| a4      | 23,3395            | 7,683                | 7,648031             |
| a5      | 23,779             | 7,329                | 7,246372             |
| a6      | 24,106             | 7,071                | 6,947527             |
| CH      | 28,51              | 2,923                | 2,922711             |
| CH3     | 30,48417           | 1,056                | 1,11852              |

MAE = 0,133767

### $^1\text{H}$ correlation

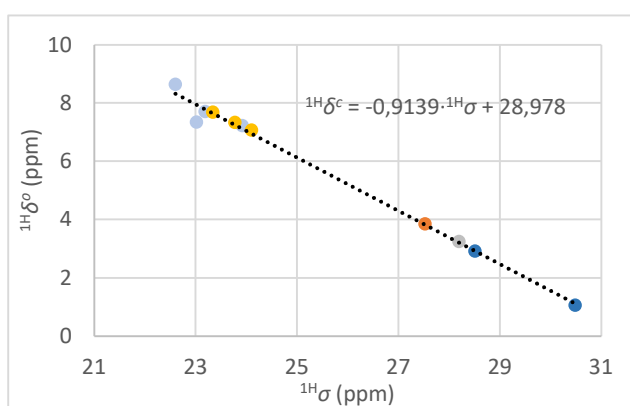

| assign. | $^{13}\text{C}\sigma$ | $^{13}\text{C}\delta^o$ | $^{13}\text{C}\delta^c$ |
|---------|-----------------------|-------------------------|-------------------------|
| p6      | 30,202                | 150,33                  | 150,8533                |
| p5      | 60,566                | 123,37                  | 122,1836                |
| p4      | 43,221                | 137,71                  | 138,5607                |
| p3      | 61,142                | 124,16                  | 121,6397                |
| p2      | 16,972                | 160,54                  | 163,345                 |
| p1      | 125,352               | 58,54                   | 61,01264                |
| a1      | 132,006               | 54,72                   | 54,72993                |
| a2      | 8,506                 | 171,67                  | 171,3386                |
| a3      | 41,341                | 139,91                  | 140,3358                |
| a4      | 65,194                | 120,07                  | 117,8138                |
| a5      | 51,9665               | 129,76                  | 130,3032                |
| a6      | 59,713                | 124,32                  | 122,989                 |
| CH      | 134,218               | 52,59                   | 52,64136                |
| CH3     | 170,353               | 18,58                   | 18,5227                 |

MAE = 1,097471

### $^{13}\text{C}$ correlation

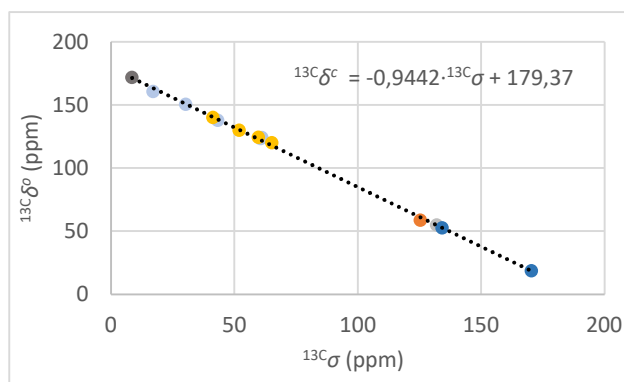

**Figure S33.** 5<sup>th</sup> conformer in free energy scale for **L**, with its calculated population at 293 K. In tables are data for the DFT calculated shieldings ( $^1\text{H}\sigma$  or  $^{13}\text{C}\sigma$ ) and observed chemical shifts ( $^1\text{H}\delta^o$  or  $^{13}\text{C}\delta^o$ ) and in diagrams are linear regression equations used for evaluation of the calculated chemical shifts ( $^1\text{H}\delta^c$  or  $^{13}\text{C}\delta^c$ ) with Mean Absolute Error (MAE) for this conformer.



## L - Conformer 6

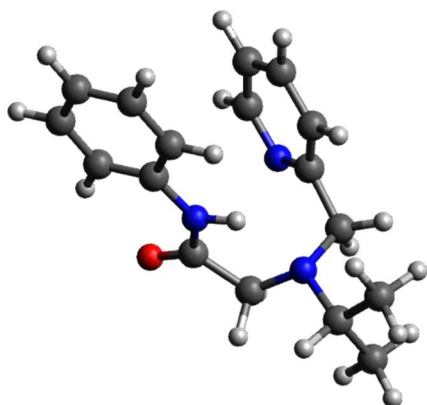

| Free Energy (G)<br>[kcal/mol] | population [%]<br>293 K |
|-------------------------------|-------------------------|
| 0.642                         | 0.070                   |

### $^1\text{H}$ correlation

| assign. | $^1\text{H}\sigma$ | $^1\text{H}\delta^o$ | $^1\text{H}\delta^c$ |
|---------|--------------------|----------------------|----------------------|
| p6      | 22,935             | 8,642                | 8,454283             |
| p5      | 24,535             | 7,228                | 6,857163             |
| p4      | 23,749             | 7,704                | 7,641748             |
| p3      | 23,595             | 7,348                | 7,795471             |
| p1      | 27,7265            | 3,85                 | 3,671408             |
| a1      | 28,127             | 3,247                | 3,271629             |
| a4      | 23,8175            | 7,683                | 7,573372             |
| a5      | 23,905             | 7,329                | 7,486029             |
| a6      | 24,175             | 7,071                | 7,216515             |
| CH      | 28,405             | 2,923                | 2,994129             |
| CH3     | 30,286             | 1,056                | 1,116515             |

MAE = 0,165029

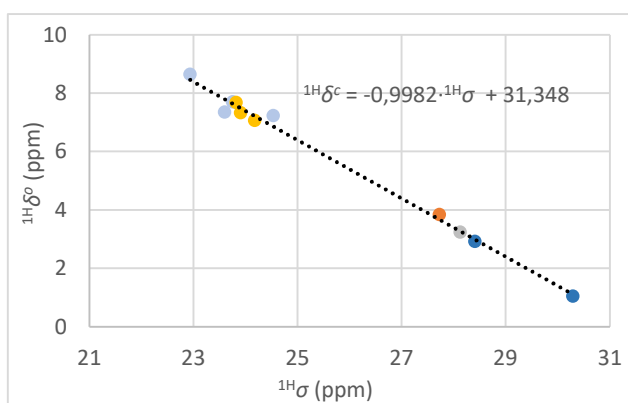

### $^{13}\text{C}$ correlation

| assign. | $^{13}\text{C}\sigma$ | $^{13}\text{C}\delta^o$ | $^{13}\text{C}\delta^c$ |
|---------|-----------------------|-------------------------|-------------------------|
| p6      | 30,819                | 150,33                  | 150,3413                |
| p5      | 60,199                | 123,37                  | 121,5812                |
| p4      | 43,001                | 137,71                  | 138,4163                |
| p3      | 56,029                | 124,16                  | 125,6632                |
| p2      | 17,761                | 160,54                  | 163,1238                |
| p1      | 129,258               | 58,54                   | 53,97934                |
| a1      | 121,945               | 54,72                   | 61,13804                |
| a2      | 8,866                 | 171,67                  | 171,8311                |
| a3      | 42,246                | 139,91                  | 139,1554                |
| a4      | 65,8345               | 120,07                  | 116,0646                |
| a5      | 52,4305               | 129,76                  | 129,1858                |
| a6      | 60,069                | 124,32                  | 121,7085                |
| CH      | 124,731               | 52,59                   | 58,41082                |
| CH3     | 168,3995              | 18,58                   | 15,66373                |

MAE = 1,097471

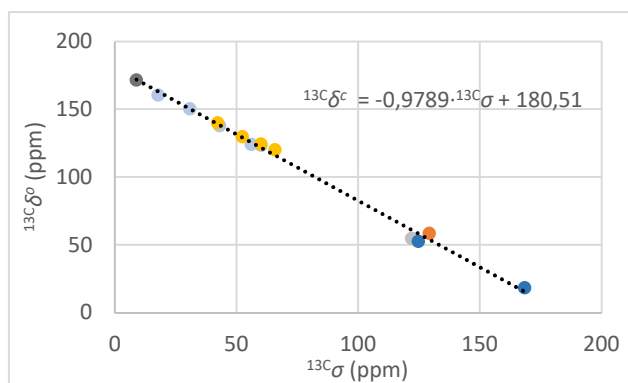

**Figure S34.** 6<sup>th</sup> conformer in free energy scale for **L**, with its calculated population at 293 K. In tables are data for the DFT calculated shieldings ( $^1\text{H}\sigma$  or  $^{13}\text{C}\sigma$ ) and observed chemical shifts ( $^1\text{H}\delta^o$  or  $^{13}\text{C}\delta^o$ ) and in diagrams are linear regression equations used for evaluation of the calculated chemical shifts ( $^1\text{H}\delta^c$  or  $^{13}\text{C}\delta^c$ ) with Mean Absolute Error (MAE) for this conformer.

## L - Conformer 7

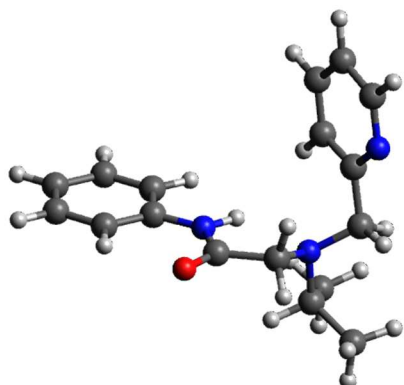

| Free Energy (G)<br>[kcal/mol] | population [%]<br>293 K |
|-------------------------------|-------------------------|
| 0.811                         | 0.052                   |

| assign. | $^1\text{H}\sigma$ | $^1\text{H}\delta^o$ | $^1\text{H}\delta^c$ |
|---------|--------------------|----------------------|----------------------|
| p6      | 22,67              | 8,642                | 8,303625             |
| p5      | 23,956             | 7,228                | 7,13015              |
| p4      | 23,373             | 7,704                | 7,662138             |
| p3      | 23,132             | 7,348                | 7,88205              |
| p1      | 27,652             | 3,85                 | 3,75755              |
| a1      | 28,456             | 3,247                | 3,0239               |
| a4      | 23,2845            | 7,683                | 7,742894             |
| a5      | 23,7165            | 7,329                | 7,348694             |
| a6      | 24,042             | 7,071                | 7,051675             |
| CH      | 28,619             | 2,923                | 2,875163             |
| CH3     | 30,3375            | 1,056                | 1,307031             |

MAE = 0,15686

### $^1\text{H}$ correlation

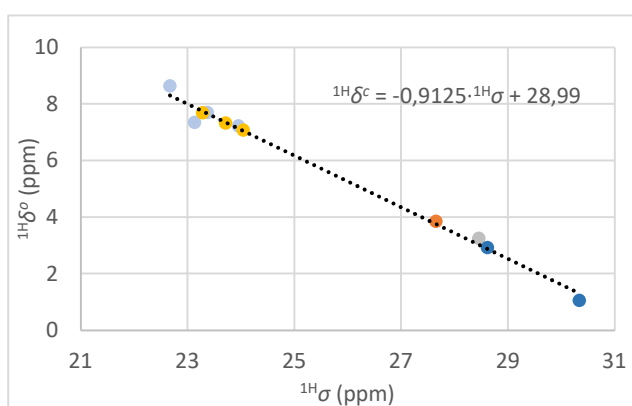

| assign. | $^{13}\text{C}\sigma$ | $^{13}\text{C}\delta^o$ | $^{13}\text{C}\delta^c$ |
|---------|-----------------------|-------------------------|-------------------------|
| p6      | 31,166                | 150,33                  | 149,7014                |
| p5      | 59,807                | 123,37                  | 122,5927                |
| p4      | 43,906                | 137,71                  | 137,643                 |
| p3      | 57,507                | 124,16                  | 124,7696                |
| p2      | 15,904                | 160,54                  | 164,1469                |
| p1      | 131,457               | 58,54                   | 54,77595                |
| a1      | 128,492               | 54,72                   | 57,58232                |
| a2      | 8,823                 | 171,67                  | 170,849                 |
| a3      | 41,184                | 139,91                  | 140,2193                |
| a4      | 65,386                | 120,07                  | 117,3122                |
| a5      | 51,966                | 129,76                  | 130,0142                |
| a6      | 59,658                | 124,32                  | 122,7337                |
| CH      | 130,634               | 52,59                   | 55,55492                |
| CH3     | 169,823               | 18,58                   | 18,46253                |

MAE = 1,50906

### $^{13}\text{C}$ correlation

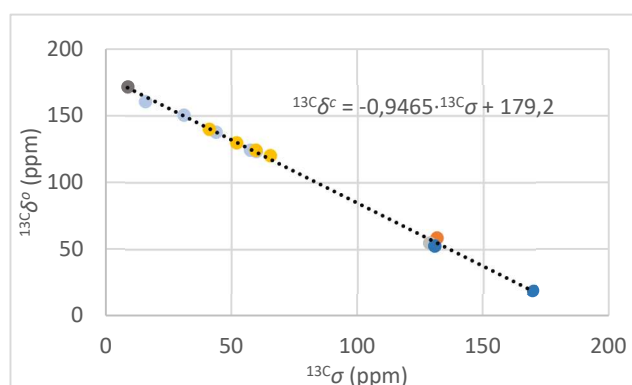

**Figure S35.** 7<sup>th</sup> conformer in free energy scale for **L**, with its calculated population at 293 K. In tables are data for the DFT calculated shieldings ( $^1\text{H}\sigma$  or  $^{13}\text{C}\sigma$ ) and observed chemical shifts ( $^1\text{H}\delta^o$  or  $^{13}\text{C}\delta^o$ ) and in diagrams are linear regression equations used for evaluation of the calculated chemical shifts ( $^1\text{H}\delta^c$  or  $^{13}\text{C}\delta^c$ ) with Mean Absolute Error (MAE) for this conformer.

## L - Conformer 8

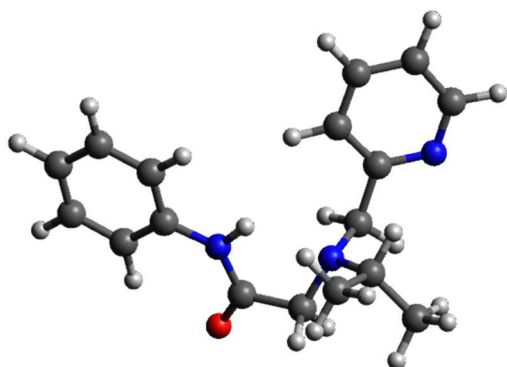

| Free Energy (G)<br>[kcal/mol] | population [%]<br>293 K |
|-------------------------------|-------------------------|
| 0.912                         | 0.044                   |

### $^1\text{H}$ correlation

| assign. | $^1\text{H}\sigma$ | $^1\text{H}\delta^o$ | $^1\text{H}\delta^c$ |
|---------|--------------------|----------------------|----------------------|
| p6      | 22,613             | 8,642                | 8,26566              |
| p5      | 23,848             | 7,228                | 7,182689             |
| p4      | 23,25              | 7,704                | 7,707075             |
| p3      | 23,21              | 7,348                | 7,742151             |
| p1      | 27,6745            | 3,85                 | 3,827231             |
| a1      | 28,274             | 3,247                | 3,301529             |
| a4      | 23,154             | 7,683                | 7,791257             |
| a5      | 23,6535            | 7,329                | 7,353246             |
| a6      | 24,001             | 7,071                | 7,048523             |
| CH      | 29,035             | 2,923                | 2,634209             |
| CH3     | 30,62717           | 1,056                | 1,238038             |

MAE = 0,13836

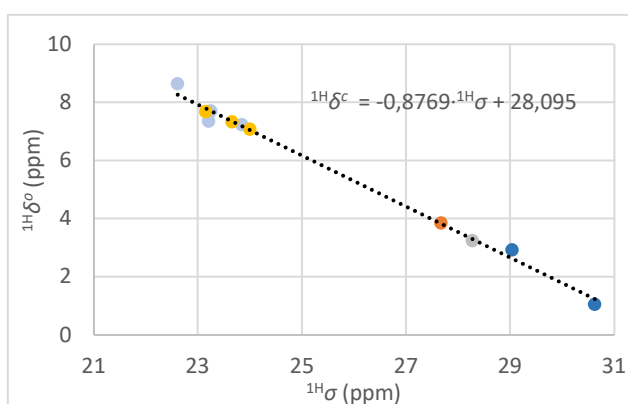

### $^{13}\text{C}$ correlation

| assign. | $^{13}\text{C}\sigma$ | $^{13}\text{C}\delta^o$ | $^{13}\text{C}\delta^c$ |
|---------|-----------------------|-------------------------|-------------------------|
| p6      | 31,166                | 150,33                  | 149,7014                |
| p5      | 59,807                | 123,37                  | 122,5927                |
| p4      | 43,906                | 137,71                  | 137,643                 |
| p3      | 57,507                | 124,16                  | 124,7696                |
| p2      | 15,904                | 160,54                  | 164,1469                |
| p1      | 131,457               | 58,54                   | 54,77595                |
| a1      | 128,492               | 54,72                   | 57,58232                |
| a2      | 8,823                 | 171,67                  | 170,849                 |
| a3      | 41,184                | 139,91                  | 140,2193                |
| a4      | 65,386                | 120,07                  | 117,3122                |
| a5      | 51,966                | 129,76                  | 130,0142                |
| a6      | 59,658                | 124,32                  | 122,7337                |
| CH      | 130,634               | 52,59                   | 55,55492                |
| CH3     | 169,823               | 18,58                   | 18,46253                |

MAE = 1,509062

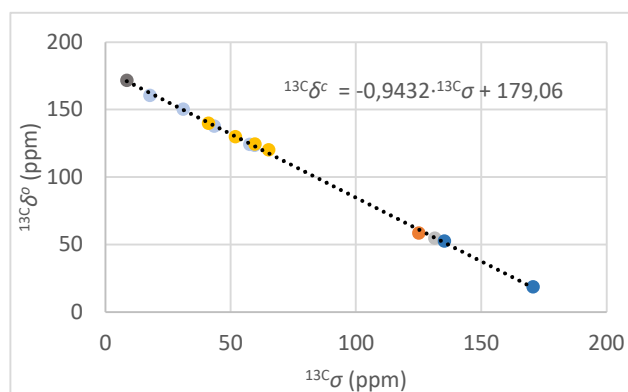

**Figure S36.** 8<sup>th</sup> conformer in free energy scale for **L**, with its calculated population at 293 K. In tables are data for the DFT calculated shieldings ( $^1\text{H}\sigma$  or  $^{13}\text{C}\sigma$ ) and observed chemical shifts ( $^1\text{H}\delta^o$  or  $^{13}\text{C}\delta^o$ ) and in diagrams are linear regression equations used for evaluation of the calculated chemical shifts ( $^1\text{H}\delta^c$  or  $^{13}\text{C}\delta^c$ ) with Mean Absolute Error (MAE) for this conformer.

## L - Conformer 9

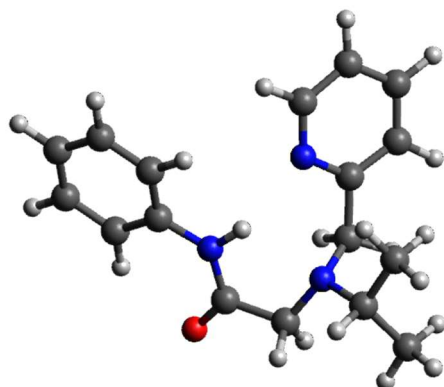

| Free Energy (G)<br>[kcal/mol] | population [%]<br>293 K |
|-------------------------------|-------------------------|
| 1.013                         | 0.037                   |

### $^1\text{H}$ correlation

| assign. | $^1\text{H}\sigma$ | $^1\text{H}\delta^o$ | $^1\text{H}\delta^c$ |
|---------|--------------------|----------------------|----------------------|
| p6      | 22,269             | 8,642                | 8,642907             |
| p5      | 23,894             | 7,228                | 7,157495             |
| p4      | 23,435             | 7,704                | 7,577067             |
| p3      | 23,862             | 7,348                | 7,186746             |
| p1      | 27,6335            | 3,85                 | 3,739218             |
| a1      | 28,0025            | 3,247                | 3,401915             |
| a4      | 23,0305            | 7,683                | 7,94682              |
| a5      | 23,6675            | 7,329                | 7,364538             |
| a6      | 24,045             | 7,071                | 7,019466             |
| CH      | 28,3               | 2,923                | 3,12997              |
| CH3     | 30,721             | 1,056                | 0,916934             |

MAE = 0,120202

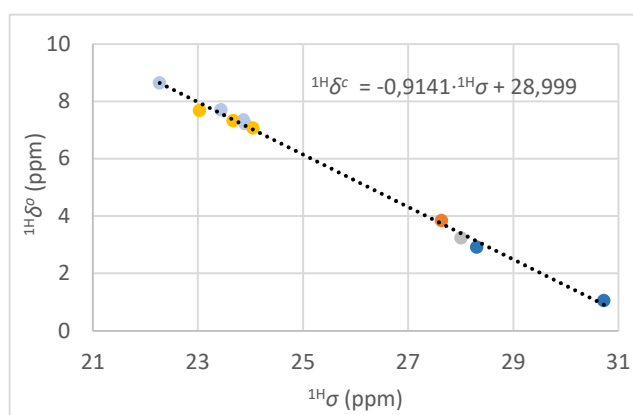

### $^{13}\text{C}$ correlation

| assign. | $^{13}\text{C}\sigma$ | $^{13}\text{C}\delta^o$ | $^{13}\text{C}\delta^c$ |
|---------|-----------------------|-------------------------|-------------------------|
| p6      | 31,08                 | 150,33                  | 149,5539                |
| p5      | 60,112                | 123,37                  | 121,6744                |
| p4      | 43,164                | 137,71                  | 137,9496                |
| p3      | 59,456                | 124,16                  | 122,3044                |
| p2      | 14,692                | 160,54                  | 165,2913                |
| p1      | 131,568               | 58,54                   | 53,05525                |
| a1      | 122,688               | 54,72                   | 61,58271                |
| a2      | 8,745                 | 171,67                  | 171,0022                |
| a3      | 40,876                | 139,91                  | 140,1468                |
| a4      | 63,8125               | 120,07                  | 118,1209                |
| a5      | 52,187                | 129,76                  | 129,2848                |
| a6      | 59,724                | 124,32                  | 122,047                 |
| CH      | 127,048               | 52,59                   | 57,39581                |
| CH3     | 169,286               | 18,58                   | 16,83465                |

MAE = 2,41562

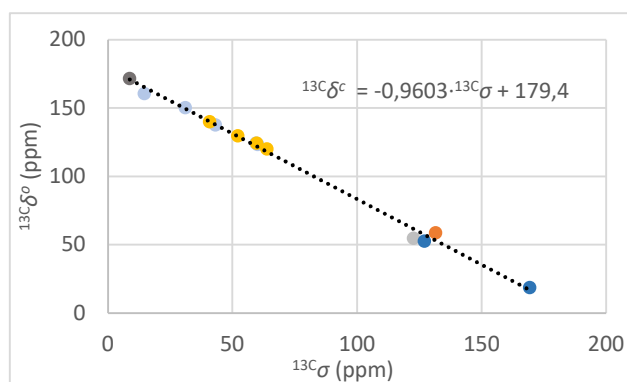

**Figure S37.** 9<sup>th</sup> conformer in free energy scale for **L**, with its calculated population at 293 K. In tables are data for the DFT calculated shieldings ( $^1\text{H}\sigma$  or  $^{13}\text{C}\sigma$ ) and observed chemical shifts ( $^1\text{H}\delta^o$  or  $^{13}\text{C}\delta^o$ ) and in diagrams are linear regression equations used for evaluation of the calculated chemical shifts ( $^1\text{H}\delta^c$  or  $^{13}\text{C}\delta^c$ ) with Mean Absolute Error (MAE) for this conformer.

## L - Conformer 10

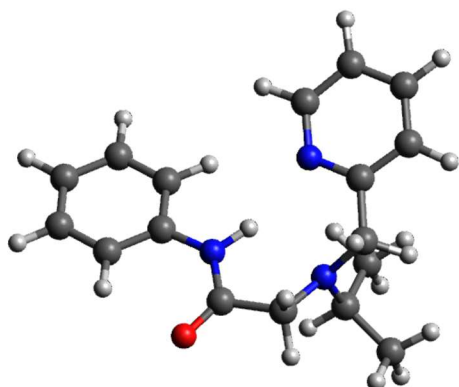

| Free Energy (G)<br>[kcal/mol] | population [%]<br>293 K |
|-------------------------------|-------------------------|
| 1.215                         | 0.026                   |

| assign. | $^1\text{H}\sigma$ | $^1\text{H}\delta^o$ | $^1\text{H}\delta^c$ |
|---------|--------------------|----------------------|----------------------|
| p6      | 22,299             | 8,642                | 8,587864             |
| p5      | 23,859             | 7,228                | 7,162804             |
| p4      | 23,379             | 7,704                | 7,601284             |
| p3      | 23,853             | 7,348                | 7,168285             |
| p1      | 27,3015            | 3,85                 | 4,01808              |
| a1      | 27,938             | 3,247                | 3,436637             |
| a4      | 23,0385            | 7,683                | 7,91233              |
| a5      | 23,633             | 7,329                | 7,369255             |
| a6      | 23,987             | 7,071                | 7,045876             |
| CH      | 28,578             | 2,923                | 2,851997             |
| CH3     | 30,69967           | 1,056                | 0,913854             |

MAE = 0,115213

### $^1\text{H}$ correlation

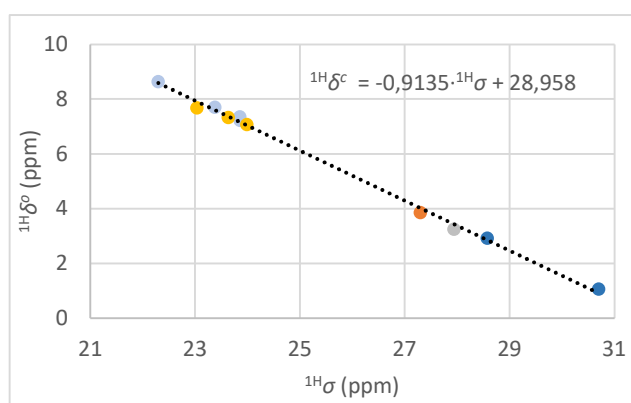

| assign. | $^{13}\text{C}\sigma$ | $^{13}\text{C}\delta^o$ | $^{13}\text{C}\delta^c$ |
|---------|-----------------------|-------------------------|-------------------------|
| p6      | 30,541                | 150,33                  | 149,4049                |
| p5      | 60,206                | 123,37                  | 121,2706                |
| p4      | 43,193                | 137,71                  | 137,4058                |
| p3      | 60,939                | 124,16                  | 120,5755                |
| p2      | 12,715                | 160,54                  | 166,3111                |
| p1      | 128,96                | 58,54                   | 56,06434                |
| a1      | 121,672               | 54,72                   | 62,97628                |
| a2      | 5,754                 | 171,67                  | 172,9129                |
| a3      | 40,47                 | 139,91                  | 139,9883                |
| a4      | 64,4335               | 120,07                  | 117,2613                |
| a5      | 52,004                | 129,76                  | 129,0494                |
| a6      | 59,972                | 124,32                  | 121,4926                |
| CH      | 131,053               | 52,59                   | 54,07933                |
| CH3     | 169,6675              | 18,58                   | 17,45734                |

MAE = 2,406871

### $^{13}\text{C}$ correlation

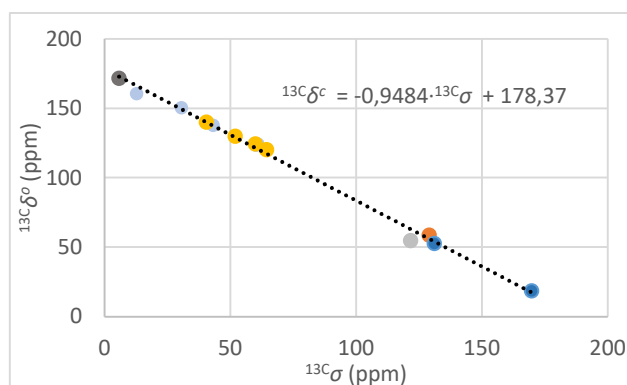

**Figure S38.** 10<sup>th</sup> conformer in free energy scale for **L**, with its calculated population at 293 K. In tables are data for the DFT calculated shieldings ( $^1\text{H}\sigma$  or  $^{13}\text{C}\sigma$ ) and observed chemical shifts ( $^1\text{H}\delta^o$  or  $^{13}\text{C}\delta^o$ ) and in diagrams are linear regression equations used for evaluation of the calculated chemical shifts ( $^1\text{H}\delta^c$  or  $^{13}\text{C}\delta^c$ ) with Mean Absolute Error (MAE) for this conformer.

## [Zn(L)<sub>2</sub>]<sup>2+</sup> - Conformer 1

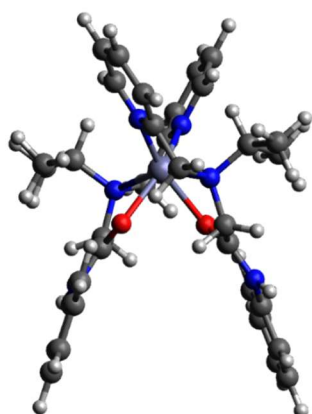

| Free Energy (G)<br>[kcal/mol] | population [%] |       |
|-------------------------------|----------------|-------|
|                               | 293 K          | 295 K |
| 0                             | 0.828          | 0.869 |

### <sup>1</sup>H correlation

| assign. | <sup>1</sup> H $\sigma$ | <sup>1</sup> H $\delta^o$ | <sup>1</sup> H $\delta^c$ |
|---------|-------------------------|---------------------------|---------------------------|
| p6      | 22,87                   | 8,147                     | 8,181514                  |
| p5      | 23,6715                 | 7,514                     | 7,429867                  |
| p4      | 22,9845                 | 8,155                     | 8,074136                  |
| p3      | 23,395                  | 7,786                     | 7,689169                  |
| p1      | 26,559                  | 4,610                     | 4,72197                   |
| p1'     | 26,6095                 | 4,542                     | 4,674611                  |
| a1'     | 27,947                  | 3,488                     | 3,420303                  |
| a1      | 27,5315                 | 4,001                     | 3,809959                  |
| a4      | 23,5705                 | 7,431                     | 7,524585                  |
| a5      | 23,68975                | 7,368                     | 7,412752                  |
| a6      | 23,8915                 | 7,195                     | 7,223551                  |
| CH      | 28,2115                 | 3,085                     | 3,172255                  |
| C'H'3   | 30,6875                 | 0,794                     | 0,850262                  |
| CH3     | 30,4745                 | 1,133                     | 1,050014                  |

MAE = 0,085218

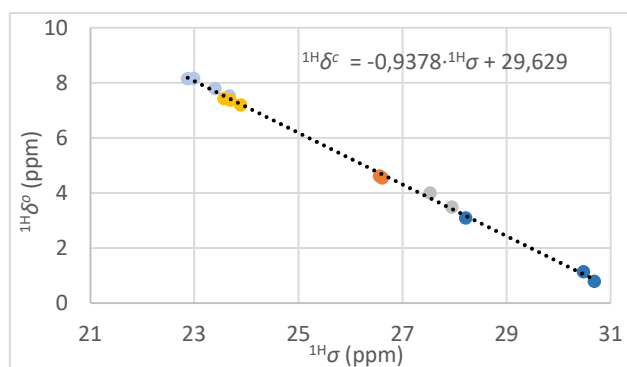

### <sup>13</sup>C correlation

| assign. | <sup>13</sup> C $\sigma$ | <sup>13</sup> C $\delta^o$ | <sup>13</sup> C $\delta^c$ |
|---------|--------------------------|----------------------------|----------------------------|
| p6      | 30,641                   | 149,44                     | 150,2714                   |
| p5      | 57,031                   | 126,55                     | 125,1323                   |
| p4      | 38,3285                  | 143                        | 142,9483                   |
| p3      | 56,433                   | 126,61                     | 125,7019                   |
| p2      | 21,642                   | 156,61                     | 158,8438                   |
| p1      | 126,3545                 | 58,72                      | 59,0947                    |
| a1      | 132,788                  | 52,07                      | 52,96615                   |
| a2      | 6,0705                   | 173,99                     | 173,6772                   |
| a3      | 43,711                   | 137,03                     | 137,8209                   |
| a4      | 62,11775                 | 122,15                     | 120,2866                   |
| a5      | 51,66925                 | 130,23                     | 130,2399                   |
| a6      | 56,276                   | 127,17                     | 125,8515                   |
| CH      | 131,881                  | 52,14                      | 53,83016                   |
| C'H'3   | 165,8365                 | 20,94                      | 21,48415                   |
| CH3     | 176,192                  | 13,1                       | 11,6195                    |

MAE = 0,98158875

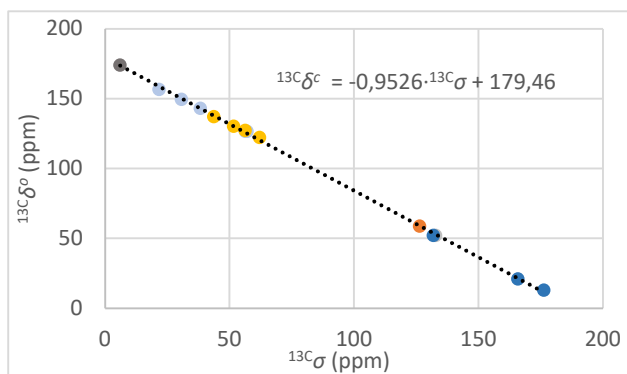

**Figure S39.** Lowest energy conformer of [Zn(L)<sub>2</sub>]<sup>2+</sup> (G=0), with its calculated populations at 293 and 253 K. In tables are data for the DFT calculated shieldings (<sup>1</sup>H $\sigma$  or <sup>13</sup>C $\sigma$ ) and observed chemical shifts (<sup>1</sup>H $\delta^o$  or <sup>13</sup>C $\delta^o$ ) and in diagrams are linear regression equations used for evaluation of the calculated chemical shifts (<sup>1</sup>H $\delta^c$  or <sup>13</sup>C $\delta^c$ ) with Mean Absolute Error (MAE) for this conformer.

## [Zn(L)<sub>2</sub>]<sup>2+</sup> - Conformer 2

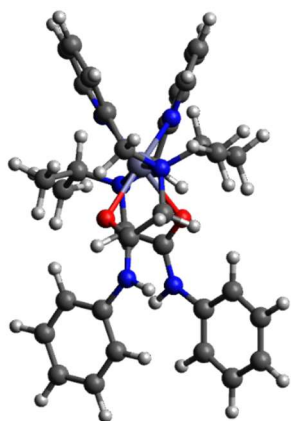

| Free Energy (G)<br>[kcal/mol] | population [%] |       |
|-------------------------------|----------------|-------|
|                               | 293 K          | 295 K |
| 1.029                         | 0.141          | 0.112 |

### <sup>1</sup>H correlation

| assign. | <sup>1</sup> Hσ | <sup>1</sup> Hδ <sup>o</sup> | <sup>1</sup> Hδ <sup>c</sup> |
|---------|-----------------|------------------------------|------------------------------|
| p6      | 22,6055         | 8,147                        | 8,373369                     |
| p5      | 23,643          | 7,514                        | 7,420633                     |
| p4      | 22,9805         | 8,155                        | 8,029007                     |
| p3      | 23,3955         | 7,786                        | 7,647912                     |
| p1      | 26,474          | 4,61                         | 4,820926                     |
| p1'     | 26,716          | 4,542                        | 4,598697                     |
| a1'     | 27,782          | 3,488                        | 3,619789                     |
| a1      | 27,736          | 4,001                        | 3,662031                     |
| a4      | 23,6005         | 7,431                        | 7,459661                     |
| a5      | 23,68475        | 7,368                        | 7,382294                     |
| a6      | 23,886          | 7,195                        | 7,197486                     |
| CH      | 28,3685         | 3,085                        | 3,081206                     |
| C'H'3   | 30,75767        | 0,794                        | 0,887235                     |
| CH3     | 30,56317        | 1,133                        | 1,065844                     |

MAE = 0,109416

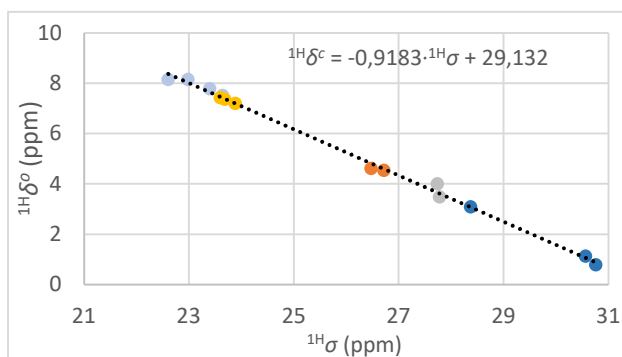

### <sup>13</sup>C correlation

| assign. | <sup>13</sup> Cσ <sup>c</sup> | <sup>13</sup> Cδ <sup>o</sup> | <sup>13</sup> Cδ <sup>c</sup> |
|---------|-------------------------------|-------------------------------|-------------------------------|
| p6      | 31,1925                       | 149,44                        | 149,8035                      |
| p5      | 57,5585                       | 126,55                        | 123,8567                      |
| p4      | 38,352                        | 143                           | 142,7578                      |
| p3      | 56,672                        | 126,61                        | 124,7291                      |
| p2      | 20,011                        | 156,61                        | 160,8072                      |
| p1      | 123,9785                      | 58,72                         | 58,49276                      |
| a1      | 126,9895                      | 52,07                         | 55,52963                      |
| a2      | 6,041                         | 173,99                        | 174,5551                      |
| a3      | 43,7625                       | 137,03                        | 137,4333                      |
| a4      | 62,0905                       | 122,15                        | 119,3967                      |
| a5      | 51,67225                      | 130,23                        | 129,6493                      |
| a6      | 56,2355                       | 127,17                        | 125,1586                      |
| CH      | 125,764                       | 52,14                         | 56,73565                      |
| C'H'3   | 165,2275                      | 20,94                         | 17,89962                      |
| CH3     | 170,1535                      | 13,1                          | 13,05194                      |

MAE = 1,804113

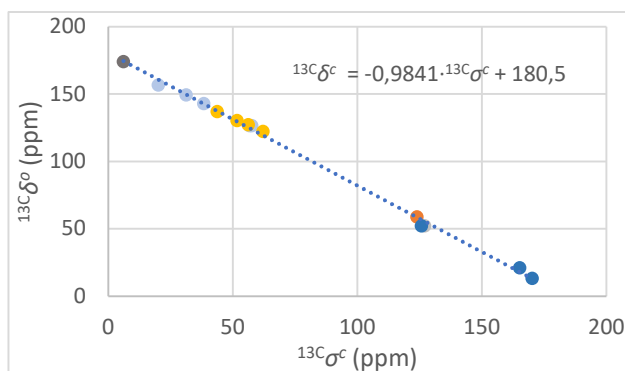

**Figure S40.** 2<sup>nd</sup> conformer in free energy scale for [Zn(L)<sub>2</sub>]<sup>2+</sup>, with its calculated populations at 293 and 253 K. In tables are data for the DFT calculated shieldings (<sup>1</sup>Hσ or <sup>13</sup>Cσ) and observed chemical shifts (<sup>1</sup>Hδ<sup>o</sup> or <sup>13</sup>Cδ<sup>o</sup>) and in diagrams are linear regression equations used for evaluation of the calculated chemical shifts (<sup>1</sup>Hδ<sup>c</sup> or <sup>13</sup>Cδ<sup>c</sup>) with Mean Absolute Error (MAE) for this conformer.

## [Zn(L)<sub>2</sub>]<sup>2+</sup> - Conformer 3

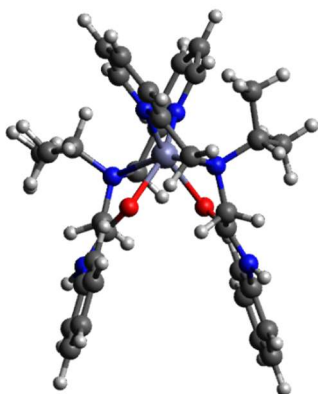

| Free Energy (G)<br>[kcal/mol] | population [%] |       |
|-------------------------------|----------------|-------|
|                               | 293 K          | 295 K |
| 1.913                         | 0.031          | 0.019 |

### <sup>1</sup>H correlation

| assign. | <sup>1</sup> Hσ <sup>c</sup> | <sup>1</sup> Hδ <sup>o</sup> | <sup>1</sup> Hδ <sup>c</sup> |
|---------|------------------------------|------------------------------|------------------------------|
| p6      | 23,4465                      | 8,147                        | 7,716928                     |
| p5      | 23,911                       | 7,514                        | 7,248712                     |
| p4      | 23,152                       | 8,155                        | 8,013784                     |
| p3      | 23,6015                      | 7,786                        | 7,560688                     |
| p1      | 27,7205                      | 4,61                         | 3,408736                     |
| p1'     | 26,913                       | 4,542                        | 4,222696                     |
| a1'     | 27,984                       | 3,488                        | 3,143128                     |
| a1      | 27,2205                      | 4,001                        | 3,912736                     |
| a4      | 23,83325                     | 7,431                        | 7,327084                     |
| a5      | 23,6565                      | 7,368                        | 7,505248                     |
| a6      | 23,814                       | 7,195                        | 7,346488                     |
| CH      | 27,917                       | 3,085                        | 3,210664                     |
| C'H'3   | 29,972                       | 0,794                        | 1,139224                     |
| CH3     | 30,24467                     | 1,133                        | 0,864376                     |

MAE = 0,29626829

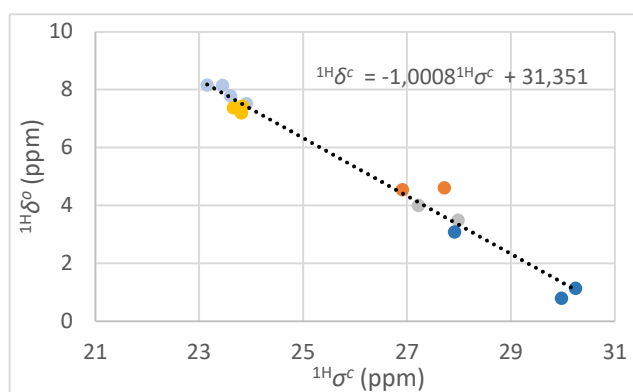

### <sup>13</sup>C correlation

| assign. | <sup>13</sup> Cσ <sup>c</sup> | <sup>13</sup> Cδ <sup>o</sup> | <sup>13</sup> Cδ <sup>c</sup> |
|---------|-------------------------------|-------------------------------|-------------------------------|
| p6      | 31,334                        | 149,44                        | 149,9169                      |
| p5      | 56,7165                       | 126,55                        | 125,3695                      |
| p4      | 38,9635                       | 143                           | 142,5384                      |
| p3      | 57,2265                       | 126,61                        | 124,8763                      |
| p2      | 21,969                        | 156,61                        | 158,9738                      |
| p1      | 126,7185                      | 58,72                         | 57,67054                      |
| a1      | 132,4965                      | 52,07                         | 52,08263                      |
| a2      | 5,0095                        | 173,99                        | 175,3753                      |
| a3      | 44,1305                       | 137,03                        | 137,5414                      |
| a4      | 62,354                        | 122,15                        | 119,9174                      |
| a5      | 51,7425                       | 130,23                        | 130,1798                      |
| a6      | 56,3765                       | 127,17                        | 125,6983                      |
| CH      | 128,974                       | 52,14                         | 55,48924                      |
| C'H'3   | 164,7095                      | 20,94                         | 20,92944                      |
| CH3     | 172,7255                      | 13,1                          | 13,17717                      |

MAE = 1,091117

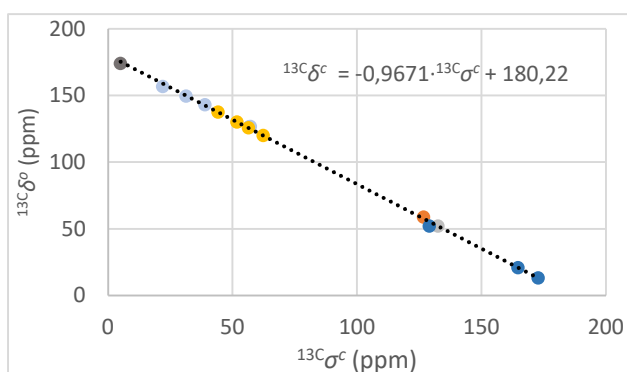

**Figure S41.** 3<sup>rd</sup> conformer in free energy scale for [Zn(L)<sub>2</sub>]<sup>2+</sup>, with its calculated populations at 293 and 253 K. In tables are data for the DFT calculated shieldings (<sup>1</sup>Hσ or <sup>13</sup>Cσ) and observed chemical shifts (<sup>1</sup>Hδ<sup>o</sup> or <sup>13</sup>Cδ<sup>o</sup>) and in diagrams are linear regression equations used for evaluation of the calculated chemical shifts (<sup>1</sup>Hδ<sup>c</sup> or <sup>13</sup>Cδ<sup>c</sup>) with Mean Absolute Error (MAE) for this conformer.



| assign.        | calc. $J$ (Hz) | exp. $J$ (Hz) |
|----------------|----------------|---------------|
| $^3J(p3,p4)$   | 6,692          | 6,84          |
| $^3J(p4,p5)$   | 6,64           | 7,5           |
| $^3J(p5,p6)$   | 4,199          | 4,8           |
| $^4J(p4,p6)$   | 1,386          | 1,73          |
| $^4J(p3,p5)$   | 0,829          | 0,95          |
| $^5J(p3,p6)$   | 1,023          | 0,83          |
| $^3J(a4,a5)$   | 7,184          | 8,16          |
| $^3J(a5,a6)$   | 6,3935         | 7,31          |
| $^4J(a4,a4)$   | 2              | 2,27          |
| $^4J(a5,a5)$   | 1,206          | 1,53          |
| $^5J(a4,a5)$   | 0,6545         | 0,47          |
| $^4J(a4,a6)$   | 0,829          | 1,13          |
| $^3J(CH,CH_3)$ | 6,023833       | 6,62          |

MAE = 0,4489

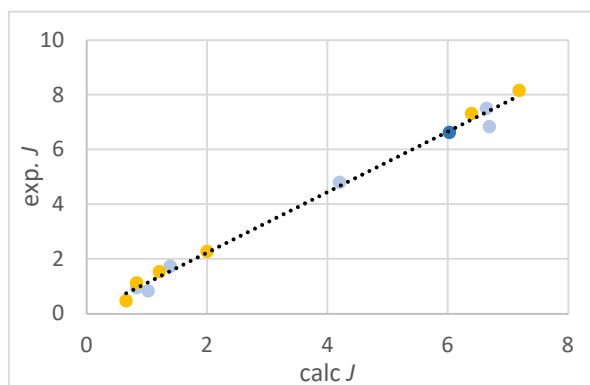

**Figure S42.** Correlation diagram between observed and calculated  $^1H$ - $^1H$   $J$  couplings for conformer 1 of L.

| assign.        | calc. $J$ (Hz) | exp. $J$ (Hz) |
|----------------|----------------|---------------|
| $^3J(p3,p4)$   | 6,69           | 6,84          |
| $^3J(p4,p5)$   | 6,637          | 7,5           |
| $^3J(p5,p6)$   | 4,164          | 4,8           |
| $^4J(p4,p6)$   | 1,378          | 1,73          |
| $^4J(p3,p5)$   | 0,833          | 0,95          |
| $^5J(p3,p6)$   | 1,025          | 0,83          |
| $^3J(a4,a5)$   | 7,19           | 8,16          |
| $^3J(a5,a6)$   | 6,3825         | 7,31          |
| $^4J(a4,a4)$   | 2,015          | 2,27          |
| $^4J(a5,a5)$   | 1,238          | 1,53          |
| $^5J(a4,a5)$   | 0,6645         | 0,47          |
| $^4J(a4,a6)$   | 0,8445         | 1,13          |
| $^3J(CH,CH_3)$ | 5,993167       | 6,62          |

MAE = 0,45115

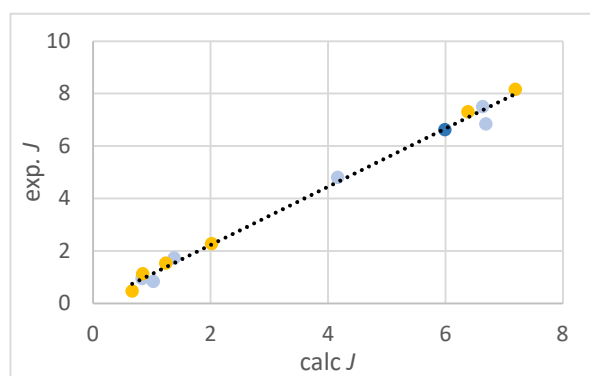

**Figure S43.** Correlation diagram between observed and calculated  $^1H$ - $^1H$   $J$  couplings for conformer 2 of L-

| assign.        | calc. $J$ (Hz) | exp. $J$ (Hz) |
|----------------|----------------|---------------|
| $^3J(p3,p4)$   | 6,715          | 6,84          |
| $^3J(p4,p5)$   | 6,633          | 7,5           |
| $^3J(p5,p6)$   | 4,209          | 4,8           |
| $^4J(p4,p6)$   | 1,383          | 1,73          |
| $^4J(p3,p5)$   | 0,836          | 0,95          |
| $^5J(p3,p6)$   | 1,022          | 0,83          |
| $^3J(a4,a5)$   | 7,1795         | 8,16          |
| $^3J(a5,a6)$   | 6,395          | 7,31          |
| $^4J(a4,a4)$   | 2,002          | 2,27          |
| $^4J(a5,a5)$   | 1,212          | 1,53          |
| $^5J(a4,a5)$   | 0,6595         | 0,47          |
| $^4J(a4,a6)$   | 0,837          | 1,13          |
| $^3J(CH,CH_3)$ | 6,015833       | 6,62          |

MAE = 0,4465

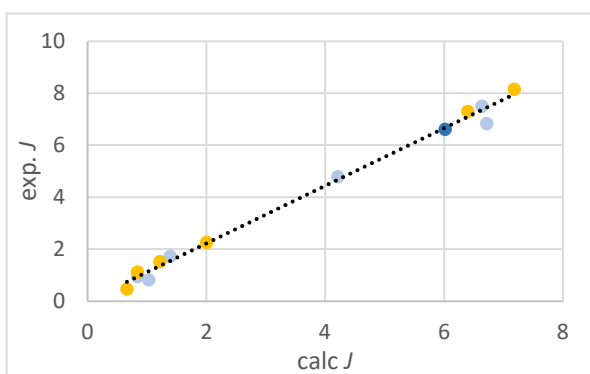

**Figure S44.** Correlation diagram between observed and calculated  $^1H$ - $^1H$   $J$  couplings for conformer 3 of L.

| assign.        | calc. $J$ (Hz) | exp. $J$ (Hz) |
|----------------|----------------|---------------|
| $^3J(p3,p4)$   | 6,845          | 6,84          |
| $^3J(p4,p5)$   | 6,522          | 7,5           |
| $^3J(p5,p6)$   | 4,344          | 4,8           |
| $^4J(p4,p6)$   | 1,365          | 1,73          |
| $^4J(p3,p5)$   | 0,813          | 0,95          |
| $^5J(p3,p6)$   | 1,068          | 0,83          |
| $^3J(a4,a5)$   | 7,1805         | 8,16          |
| $^3J(a5,a6)$   | 6,3955         | 7,31          |
| $^4J(a4,a4)$   | 2,01           | 2,27          |
| $^4J(a5,a5)$   | 1,21           | 1,53          |
| $^5J(a4,a5)$   | 0,6505         | 0,47          |
| $^4J(a4,a6)$   | 0,8265         | 1,13          |
| $^3J(CH,CH_3)$ | 6,017333       | 6,62          |

MAE = 0,44151

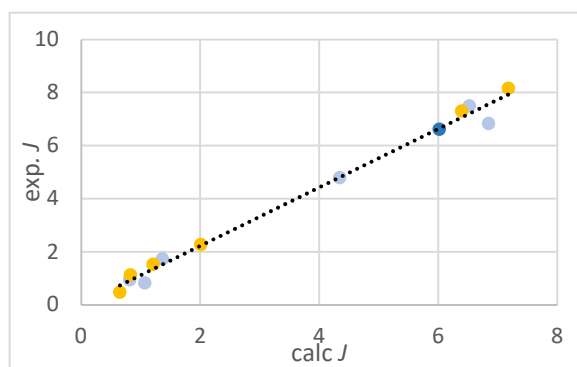

**Figure S45.** Correlation diagram between observed and calculated  $^1H$ - $^1H$   $J$  couplings for conformer 4 of **L**.

| assign.        | calc. $J$ (Hz) | exp. $J$ (Hz) |
|----------------|----------------|---------------|
| $^3J(p3,p4)$   | 7,001          | 6,84          |
| $^3J(p4,p5)$   | 6,524          | 7,5           |
| $^3J(p5,p6)$   | 4,204          | 4,8           |
| $^4J(p4,p6)$   | 1,395          | 1,73          |
| $^4J(p3,p5)$   | 0,843          | 0,95          |
| $^5J(p3,p6)$   | 1,062          | 0,83          |
| $^3J(a4,a5)$   | 7,1745         | 8,16          |
| $^3J(a5,a6)$   | 6,396          | 7,31          |
| $^4J(a4,a4)$   | 2,039          | 2,27          |
| $^4J(a5,a5)$   | 1,227          | 1,53          |
| $^5J(a4,a5)$   | 0,664          | 0,47          |
| $^4J(a4,a6)$   | 0,833          | 1,13          |
| $^3J(CH,CH_3)$ | 5,999167       | 6,62          |

MAE = 0,45787

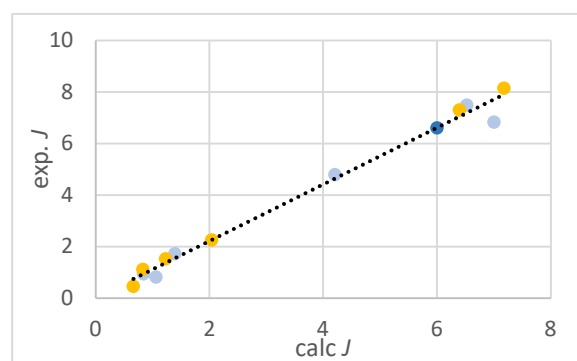

**Figure S46.** Correlation diagram between observed and calculated  $^1H$ - $^1H$   $J$  couplings for conformer 5 of **L**.

| assign.        | calc. $J$ (Hz) | exp. $J$ (Hz) |
|----------------|----------------|---------------|
| $^3J(p3,p4)$   | 6,857          | 6,84          |
| $^3J(p4,p5)$   | 6,522          | 7,5           |
| $^3J(p5,p6)$   | 4,337          | 4,8           |
| $^4J(p4,p6)$   | 1,37           | 1,73          |
| $^4J(p3,p5)$   | 0,829          | 0,95          |
| $^5J(p3,p6)$   | 1,07           | 0,83          |
| $^3J(a4,a5)$   | 7,163          | 8,16          |
| $^3J(a5,a6)$   | 6,4035         | 7,31          |
| $^4J(a4,a4)$   | 2,014          | 2,27          |
| $^4J(a5,a5)$   | 1,213          | 1,53          |
| $^5J(a4,a5)$   | 0,6525         | 0,47          |
| $^4J(a4,a6)$   | 0,8305         | 1,13          |
| $^3J(CH,CH_3)$ | 6,0235         | 6,62          |

MAE = 0,44108

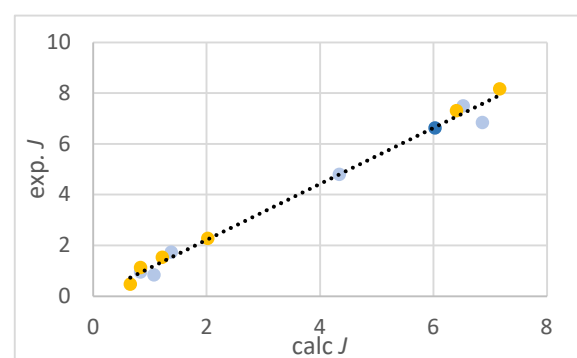

**Figure S47.** Correlation diagram between observed and calculated  $^1H$ - $^1H$   $J$  couplings for conformer 6 of **L**.

| assign.        | calc. $J$ (Hz) | exp. $J$ (Hz) |
|----------------|----------------|---------------|
| $^3J(p3,p4)$   | 6,952          | 6,84          |
| $^3J(p4,p5)$   | 6,436          | 7,5           |
| $^3J(p5,p6)$   | 4,365          | 4,8           |
| $^4J(p4,p6)$   | 1,36           | 1,73          |
| $^4J(p3,p5)$   | 0,849          | 0,95          |
| $^5J(p3,p6)$   | 1,078          | 0,83          |
| $^3J(a4,a5)$   | 7,1745         | 8,16          |
| $^3J(a5,a6)$   | 6,3985         | 7,31          |
| $^4J(a4,a4)$   | 2,022          | 2,27          |
| $^4J(a5,a5)$   | 1,22           | 1,53          |
| $^5J(a4,a5)$   | 0,666          | 0,47          |
| $^4J(a4,a6)$   | 0,8325         | 1,13          |
| $^3J(CH,CH_3)$ | 6,004167       | 6,62          |

MAE = 0,45341

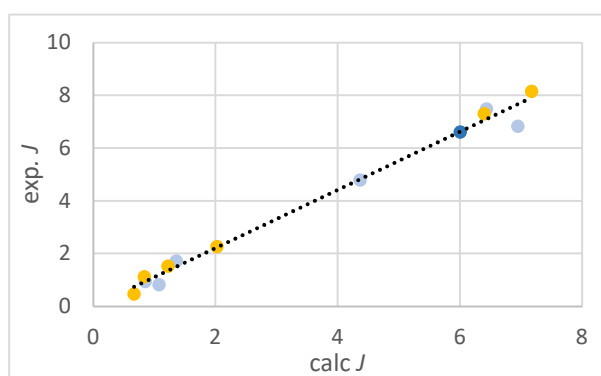

**Figure S48.** Correlation diagram between observed and calculated  $^1H$ - $^1H$   $J$  couplings for conformer 7 of **L**.

| assign.        | calc. $J$ (Hz) | exp. $J$ (Hz) |
|----------------|----------------|---------------|
| $^3J(p3,p4)$   | 6,907          | 6,84          |
| $^3J(p4,p5)$   | 6,509          | 7,5           |
| $^3J(p5,p6)$   | 4,338          | 4,8           |
| $^4J(p4,p6)$   | 1,364          | 1,73          |
| $^4J(p3,p5)$   | 0,818          | 0,95          |
| $^5J(p3,p6)$   | 1,076          | 0,83          |
| $^3J(a4,a5)$   | 7,1785         | 8,16          |
| $^3J(a5,a6)$   | 6,398          | 7,31          |
| $^4J(a4,a4)$   | 2,017          | 2,27          |
| $^4J(a5,a5)$   | 1,211          | 1,53          |
| $^5J(a4,a5)$   | 0,6585         | 0,47          |
| $^4J(a4,a6)$   | 0,824          | 1,13          |
| $^3J(CH,CH_3)$ | 6,021167       | 6,62          |

MAE = 0,44791

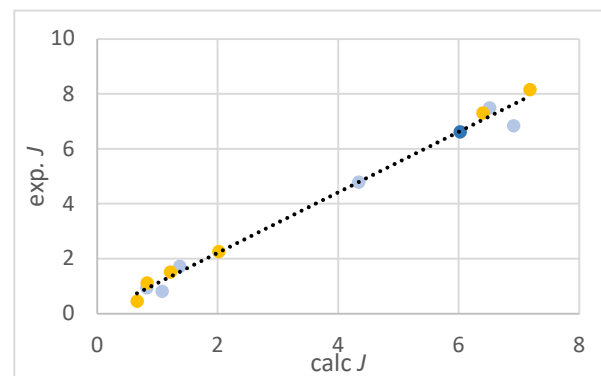

**Figure S49.** Correlation diagram between observed and calculated  $^1H$ - $^1H$   $J$  couplings for conformer 8 of **L**.

| assign.        | calc. $J$ (Hz) | exp. $J$ (Hz) |
|----------------|----------------|---------------|
| $^3J(p3,p4)$   | 6,81           | 6,84          |
| $^3J(p4,p5)$   | 6,529          | 7,5           |
| $^3J(p5,p6)$   | 4,251          | 4,8           |
| $^4J(p4,p6)$   | 1,374          | 1,73          |
| $^4J(p3,p5)$   | 0,819          | 0,95          |
| $^5J(p3,p6)$   | 1,047          | 0,83          |
| $^3J(a4,a5)$   | 7,2055         | 8,16          |
| $^3J(a5,a6)$   | 6,3805         | 7,31          |
| $^4J(a4,a4)$   | 2,007          | 2,27          |
| $^4J(a5,a5)$   | 1,247          | 1,53          |
| $^5J(a4,a5)$   | 0,671          | 0,47          |
| $^4J(a4,a6)$   | 0,8525         | 1,13          |
| $^3J(CH,CH_3)$ | 6,031667       | 6,62          |

MAE = 0,44237

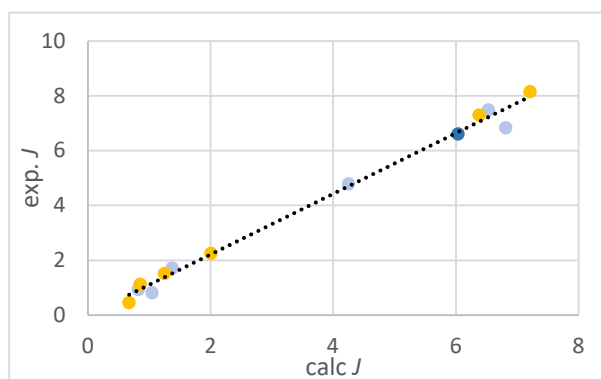

**Figure S50.** Correlation diagram between observed and calculated  $^1H$ - $^1H$   $J$  couplings for conformer 9 of **L**.

| assign.        | calc. $J$ (Hz) | exp. $J$ (Hz) |
|----------------|----------------|---------------|
| $^3J(p3,p4)$   | 6,823          | 6,84          |
| $^3J(p4,p5)$   | 6,479          | 7,5           |
| $^3J(p5,p6)$   | 4,273          | 4,8           |
| $^4J(p4,p6)$   | 1,361          | 1,73          |
| $^4J(p3,p5)$   | 0,807          | 0,95          |
| $^5J(p3,p6)$   | 1,059          | 0,83          |
| $^3J(a4,a5)$   | 7,177          | 8,16          |
| $^3J(a5,a6)$   | 6,387          | 7,31          |
| $^4J(a4,a4)$   | 1,99           | 2,27          |
| $^4J(a5,a5)$   | 1,239          | 1,53          |
| $^5J(a4,a5)$   | 0,662          | 0,47          |
| $^4J(a4,a6)$   | 0,852          | 1,13          |
| $^3J(CH,CH_3)$ | 5,969833       | 6,62          |

MAE = 0,45409

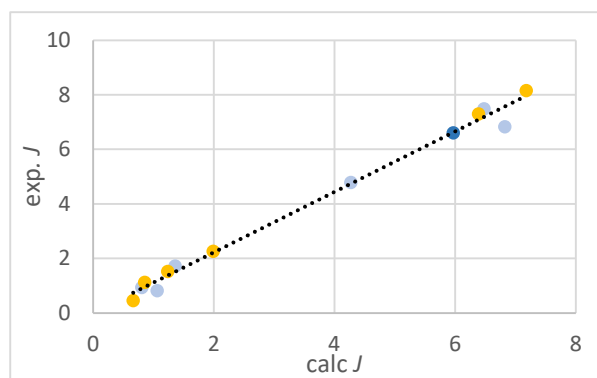

**Figure S51.** Correlation diagram between observed and calculated  $^1H$ - $^1H$   $J$  couplings for conformer 10 of **L**.

| assign.            | calc. $J$ (Hz)<br>(-40 °C) | exp. $J$ (Hz)<br>(-40 °C) |
|--------------------|----------------------------|---------------------------|
| $^2J(p1,p1')$      | -15,2135                   | -15,56                    |
| $^2J(a1,a1')$      | -17,502                    | -16,96                    |
| $^3J(p3,p4)$       | 6,8695                     | 7,66                      |
| $^3J(p4,p5)$       | 6,6765                     | 7,57                      |
| $^3J(p5,p6)$       | 4,7215                     | 5,71                      |
| $^4J(p4,p6)$       | 1,2315                     | 1,72                      |
| $^4J(p3,p5)$       | 0,905                      | 0,78                      |
| $^5J(p3,p6)$       | 0,995                      | 0,70                      |
| $^3J(a4,a5)$       | 7,23025                    | 8,10                      |
| $^3J(a5,a6)$       | 6,46825                    | 7,43                      |
| $^4J(a4,a4)$       | 2,097                      | 2,38                      |
| $^4J(a5,a5)$       | 1,185                      | 1,40                      |
| $^5J(a4,a5)$       | 0,6625                     | 0,44                      |
| $^4J(a4,a6)$       | 0,77725                    | 0,97                      |
| $^3J(CH,C'H'_3)$   | 6,139667                   | 6,56                      |
| $^3J(CH,CH_3)$     | 5,736167                   | 6,47                      |
| $^4J(CH_3,C'H'_3)$ | 0,350111                   | 0,22                      |

MAE = 0,499913

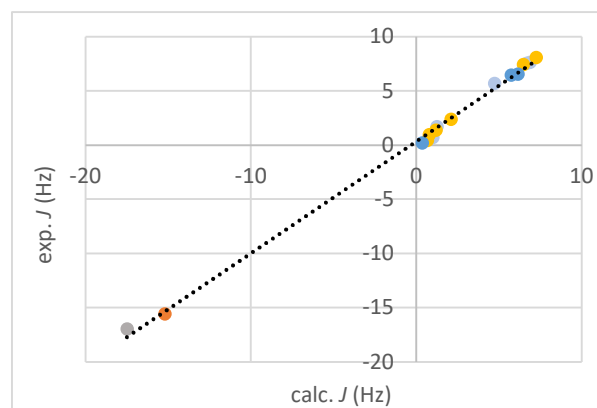

**Figure S52.** Correlation diagram between observed and calculated  $^1H$ - $^1H$   $J$  couplings for conformer 1 of  $[Zn(L)_2]^{2+}$ .

| assign.            | calc. $J$ (Hz)<br>(-40 °C) | exp. $J$ (Hz)<br>(-40 °C) |
|--------------------|----------------------------|---------------------------|
| $^2J(p1,p1')$      | -16,085                    | -15,56                    |
| $^2J(a1,a1')$      | -17,6035                   | -16,96                    |
| $^3J(p3,p4)$       | 6,896                      | 7,66                      |
| $^3J(p4,p5)$       | 6,6235                     | 7,57                      |
| $^3J(p5,p6)$       | 4,829                      | 5,71                      |
| $^4J(p4,p6)$       | 1,2305                     | 1,72                      |
| $^4J(p3,p5)$       | 0,9195                     | 0,78                      |
| $^5J(p3,p6)$       | 0,982                      | 0,70                      |
| $^3J(a4,a5)$       | 7,24325                    | 8,10                      |
| $^3J(a5,a6)$       | 6,46475                    | 7,43                      |
| $^4J(a4,a4)$       | 2,1015                     | 2,38                      |
| $^4J(a5,a5)$       | 1,194                      | 1,40                      |
| $^5J(a4,a5)$       | 0,66125                    | 0,44                      |
| $^4J(a4,a6)$       | 0,78175                    | 0,97                      |
| $^3J(CH,C'H'_3)$   | 6,055167                   | 6,56                      |
| $^3J(CH,CH_3)$     | 5,728167                   | 6,47                      |
| $^4J(CH_3,C'H'_3)$ | 0,400056                   | 0,22                      |

MAE = 0,518454

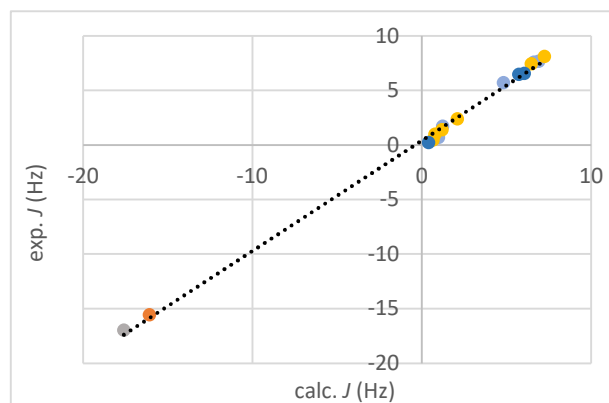

**Figure S53.** Correlation diagram between observed and calculated  $^1H$ - $^1H$   $J$  couplings for conformer 2 of  $[Zn(L)_2]^{2+}$ .

| assign.            | calc. $J$ (Hz)<br>(-40 °C) | exp. $J$ (Hz)<br>(-40 °C) |
|--------------------|----------------------------|---------------------------|
| $^2J(p1,p1')$      | -15,957                    | -15,56                    |
| $^2J(a1,a1')$      | -17,265                    | -16,96                    |
| $^3J(p3,p4)$       | 6,928                      | 7,66                      |
| $^3J(p4,p5)$       | 6,63                       | 7,57                      |
| $^3J(p5,p6)$       | 4,7755                     | 5,71                      |
| $^4J(p4,p6)$       | 1,225                      | 1,72                      |
| $^4J(p3,p5)$       | 0,9155                     | 0,78                      |
| $^5J(p3,p6)$       | 0,9985                     | 0,70                      |
| $^3J(a4,a5)$       | 7,20575                    | 8,10                      |
| $^3J(a5,a6)$       | 6,46575                    | 7,43                      |
| $^4J(a4,a4)$       | 2,096                      | 2,38                      |
| $^4J(a5,a5)$       | 1,184                      | 1,40                      |
| $^5J(a4,a5)$       | 0,66325                    | 0,44                      |
| $^4J(a4,a6)$       | 0,779                      | 0,97                      |
| $^3J(CH,C'H'_3)$   | 6,134                      | 6,56                      |
| $^3J(CH,CH_3)$     | 5,806                      | 6,47                      |
| $^4J(CH_3,C'H'_3)$ | 0,345333                   | 0,22                      |

MAE = 0,483858

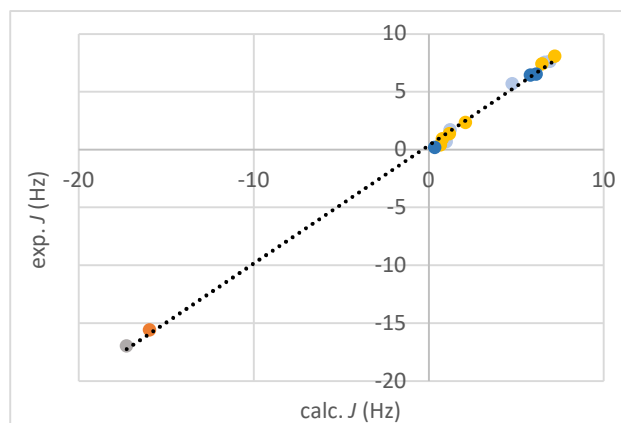

**Figure S54.** Correlation diagram between observed and calculated  $^1H$ - $^1H$   $J$  couplings for conformer 3 of  $[Zn(L)_2]^{2+}$ .

## X-ray crystallography

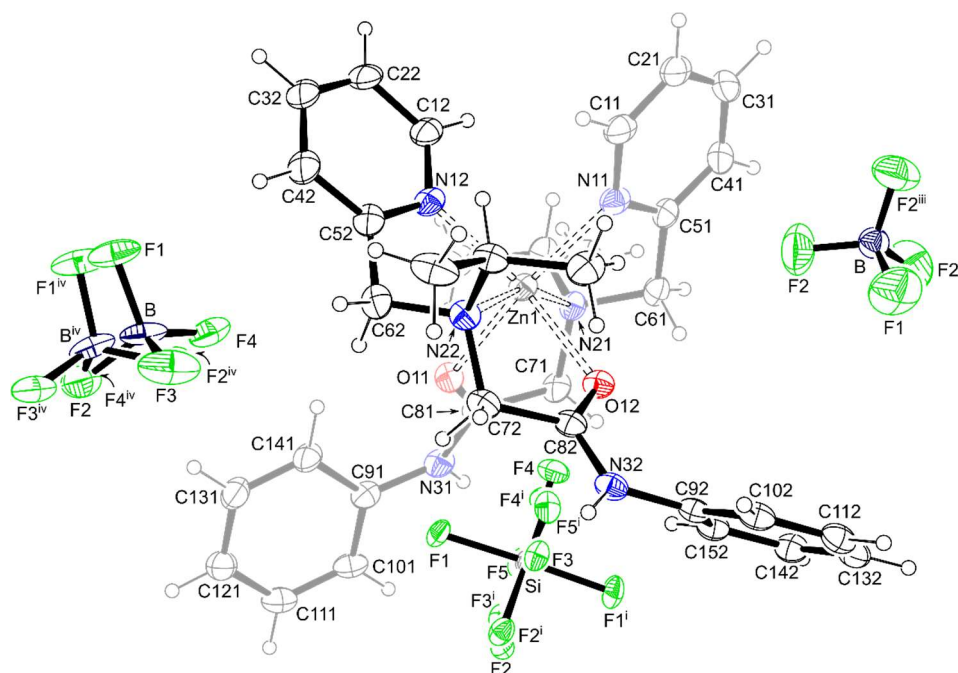

**Figure S55.** The ORTEP-III [ref. 32 in manuscript] diagram of the  $[\text{Zn}(\text{L})_2][\text{SiF}_6][\text{BF}_4]_2$  with complete atom labeling scheme. Symmetry codes: (i)  $1/2-y, 1/2-x, 1/2-z$ ; (ii)  $1/2-z, 1/2-x, z$ ; (iii)  $1/2-y, z, 1/2-x$ ; (iv)  $3/2-x, y, 1/2-z$ .

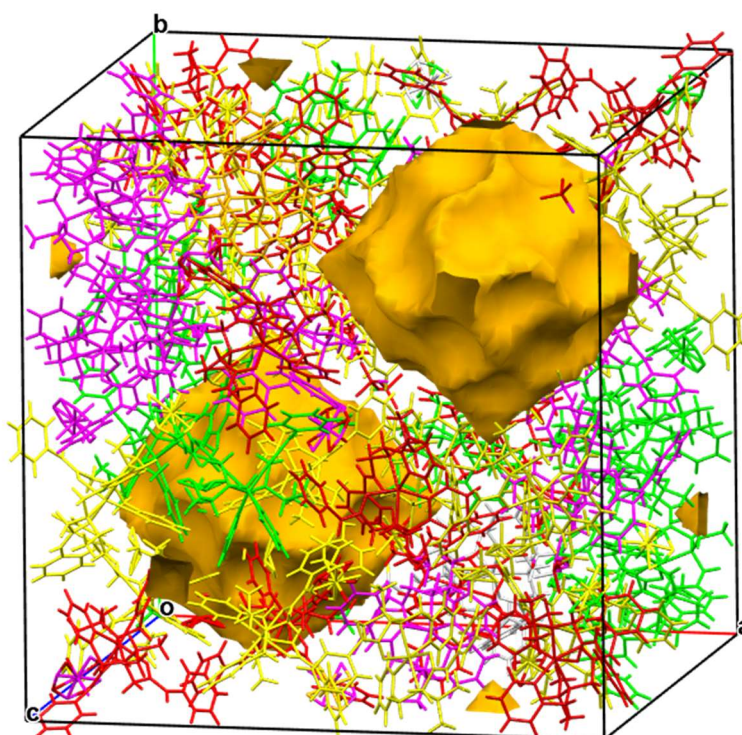

**Figure S56.** Crystal packing of cations and anions in solid-state structure of  $[\text{Zn}(\text{L})_2][\text{SiF}_6][\text{BF}_4]_2$  with representation of solvent accessible areas in unit cell. Cations and anions are shown in different colours.

**Table S1.** Comparison of bonds and selected angles for the most stable *mer* -  $[\text{Zn}(\text{L}_2)]^{2+}$  cation obtained from DFT-NMR analysis (Figure S39) and the *mer*-  $[\text{Zn}(\text{L}_2)]^{2+}$  cation obtained from the single-crystal X-ray diffraction.

| parameter <sup>1</sup>       |                | [Zn(L <sub>2</sub> )] <sup>2+</sup> from DFT/NMR<br>(C <sub>2</sub> symmetry) | [Zn(L <sub>2</sub> )] <sup>2+</sup> from X-ray diffraction |            |
|------------------------------|----------------|-------------------------------------------------------------------------------|------------------------------------------------------------|------------|
| bonds                        |                |                                                                               |                                                            |            |
| L1                           | L2             |                                                                               | L1                                                         | L2         |
| Zn-N11                       | Zn-N12         | 2.120                                                                         | 2.101(3)                                                   | 2.107(2)   |
| Zn-N21                       | Zn-N22         | 2.241                                                                         | 2.250(2)                                                   | 2.228(2)   |
| Zn-O11                       | Zn-O12         | 2.178                                                                         | 2.140(2)                                                   | 2.153(2)   |
| N11-C51                      | N12-C52        | 1.344                                                                         | 1.347(4)                                                   | 1.358(4)   |
| N11-C11                      | N12-C12        | 1.342                                                                         | 1.350(4)                                                   | 1.339(4)   |
| C11-C21                      | C12-C22        | 1.386                                                                         | 1.364(5)                                                   | 1.384(4)   |
| C21-C31                      | C22-C32        | 1.391                                                                         | 1.376(6)                                                   | 1.388(6)   |
| C31-C41                      | C32-C42        | 1.389                                                                         | 1.387(6)                                                   | 1.381(6)   |
| C41-C51                      | C42-C52        | 1.389                                                                         | 1.382(5)                                                   | 1.378(4)   |
| C51-C61                      | C52-C62        | 1.506                                                                         | 1.501(4)                                                   | 1.492(5)   |
| C61-N21                      | C62-N22        | 1.481                                                                         | 1.481(4)                                                   | 1.489(4)   |
| N21-C71                      | N22-C72        | 1.468                                                                         | 1.471(4)                                                   | 1.473(4)   |
| C71-C81                      | C72-C82        | 1.522                                                                         | 1.520(4)                                                   | 1.523(4)   |
| C81-O11                      | C82-O22        | 1.244                                                                         | 1.242(3)                                                   | 1.246(3)   |
| C81-N31                      | C82-N32        | 1.342                                                                         | 1.333(4)                                                   | 1.331(4)   |
| N31-C91                      | N32-C92        | 1.414                                                                         | 1.413(4)                                                   | 1.427(4)   |
| C91-C101                     | C92-C102       | 1.399                                                                         | 1.387(4)                                                   | 1.387(4)   |
| C91-C141                     | C92-C142       | 1.388                                                                         | 1.394(4)                                                   | 1.394(4)   |
| C101-C111                    | C102-C112      | 1.394                                                                         | 1.389(5)                                                   | 1.382(4)   |
| C111-C121                    | C112-C122      | 1.392                                                                         | 1.389(5)                                                   | 1.391(4)   |
| C121-C131                    | C122-C132      | 1.392                                                                         | 1.382(4)                                                   | 1.382(4)   |
| C131-C141                    | C132-C142      | 1.398                                                                         | 1.381(5)                                                   | 1.384(4)   |
| N21-C151                     | N22-C152       | 1.512                                                                         | 1.509(4)                                                   | 1.514(3)   |
| C151-C161                    | C152-C162      | 1.530                                                                         | 1.537(5)                                                   | 1.529(4)   |
| C151-C171                    | C152-C172      | 1.524                                                                         | 1.515(4)                                                   | 1.521(5)   |
| selected angles <sup>2</sup> |                |                                                                               |                                                            |            |
| N11-Zn-N21                   | N12-Zn-N22     | 78.2                                                                          | 78.54(9)                                                   | 78.08(9)N  |
| N21-Zn-O11                   | N22-Zn-O12     | 76.6                                                                          | 76.42(8)                                                   | 77.52(8)   |
| N11-Zn-O11                   | N12-Zn-O12     | 154.8                                                                         | 154.84(9)                                                  | 155.56(8)  |
| N11-Zn-N22                   | N12-Zn-N21     | 117.1                                                                         | 117.57(9)                                                  | 114.53(9)  |
| N11-Zn-O12                   | N12-Zn-O11     | 94.8                                                                          | 95.50(8)                                                   | 93.77(9)   |
| N21-Zn-O12                   | N22-Zn-O11     | 87.4                                                                          | 89.36(8)                                                   | 87.41(8)   |
| N11-Zn-N12                   |                | 96.2                                                                          | 94.40(10)                                                  |            |
| N21-Zn-N22                   |                | 158.3                                                                         | 159.80(9)                                                  |            |
| O11-Zn-O12                   |                | 84.6                                                                          | 86.63(8)                                                   |            |
| Zn-N11-C51                   | Zn-N12-C52     | 113.2                                                                         | 113.42(19)                                                 | 112.9(2)   |
| N11-C51-C61                  | N12-C52-C62    | 116.1                                                                         | 115.0(3)                                                   | 115.6(2)   |
| C51-C61-N21                  | C52-C62-N22    | 110.2                                                                         | 109.4(2)                                                   | 109.1(2)   |
| Zn-N21-C61                   | Zn-N22-C62     | 100.6                                                                         | 99.34(16)                                                  | 100.06(16) |
| Zn-N21-C71                   | Zn-N22-C72     | 106.5                                                                         | 104.67(16)                                                 | 105.64(15) |
| N21-C71-C81                  | N22-C72-C82    | 110.5                                                                         | 109.5(2)                                                   | 109.8(2)   |
| C71-C81-O11                  | C72-C82-O12    | 121.0                                                                         | 119.5(2)                                                   | 120.4(3)   |
| Zn-O11-C81                   | Zn-O12-C82     | 114.5                                                                         | 115.74(18)                                                 | 114.53(18) |
| Zn-N21-C151                  | Zn-N22-C152    | 112.3                                                                         | 116.07(17)                                                 | 115.18(17) |
| N21-C151-C161                | N22-C152-C162  | 114.0                                                                         | 113.8(3)                                                   | 113.0(2)   |
| N21-C151-C171                | N22-C152-C172  | 111.4                                                                         | 112.1(3)                                                   | 111.3(2)   |
| C161-C151-C171               | C162-C152-C172 | 110.2                                                                         | 109.7(3)                                                   | 111.3(3)   |

<sup>1</sup> Labels are according to crystal structure, Figure S55

<sup>2</sup> Angles at metal atom, angles in chelating rings and angles in isopropyl groups.

**Table S2.** Comparison of selected torsion angles for the most stable *mer* -  $[\text{Zn}(\text{L}_2)]^{2+}$  cation obtained from DFT-NMR analysis (Figure S39) and the *mer* -  $[\text{Zn}(\text{L}_2)]^{2+}$  cation obtained from the single-crystal X-ray diffraction.

| torsion angle <sup>1</sup> |                  | $[\text{Zn}(\text{L}_2)]^{2+}$ from DFT-NMR<br>( $C_2$ symmetry) | $[\text{Zn}(\text{L}_2)]^{2+}$ from X-ray diffraction |           |
|----------------------------|------------------|------------------------------------------------------------------|-------------------------------------------------------|-----------|
| L1                         | L2               |                                                                  | L1                                                    | L2        |
| O12-Zn-N11-C51             | O11-Zn-N12-C52   | 67.7                                                             | 73.2(2)                                               | 67.4(2)   |
| Zn-N11-C51-C61             | Zn-N12-C52-C62   | -4.2                                                             | -10.6(3)                                              | -5.2(3)   |
| N11-C51-C61-N21            | N12-C52-C62-N22  | 38.8                                                             | 45.4(3)                                               | 41.1(3)   |
| C51-C61-N21-C71            | C52-C62-N22-C72  | -161.3                                                           | -161.6(2)                                             | -162.7(2) |
| C61-N21-C71-C81            | C62-N22-C72-C82  | 143.2                                                            | 146.2(2)                                              | 144.6(2)  |
| N21-C71-C81-N31            | N22-C72-C82-N32  | 159.4                                                            | 150.5(2)                                              | 151.6(2)  |
| N21-C71-C81-O11            | N22-C72-C82-O12  | -23.1                                                            | -30.4(4)                                              | -29.8(4)  |
| C71-C81-O11-Zn             | C72-C82-O12-Zn   | -2.5                                                             | 2.3(3)                                                | 4.5(3)    |
| C81-O11-Zn-N21             | C82-O12-Zn-N22   | 17.1                                                             | 16.17(19)                                             | 13.35(19) |
| C71-C81-N31-C91            | C72-C82-N32-C92  | 174.0                                                            | 177.9(3)                                              | -176.9(2) |
| C81-N31-C91-C101           | C82-N32-C92-C102 | 160.9                                                            | -158.0(3)                                             | 125.6(3)  |
| O11-Zn-N21-C151            | O12-Zn-N22-C152  | 97.0                                                             | 94.40(19)                                             | 97.29(19) |
| Zn-N21-C151-C161           | Zn-N22-C152-C162 | 168.8                                                            | 173.2(2)                                              | 169.4(2)  |
| Zn-N21-C151-C171           | Zn-N22-C152-C172 | -65.8                                                            | -61.6(3)                                              | -64.5(3)  |

<sup>1</sup> Labels are according to the crystal structure, Figure S55

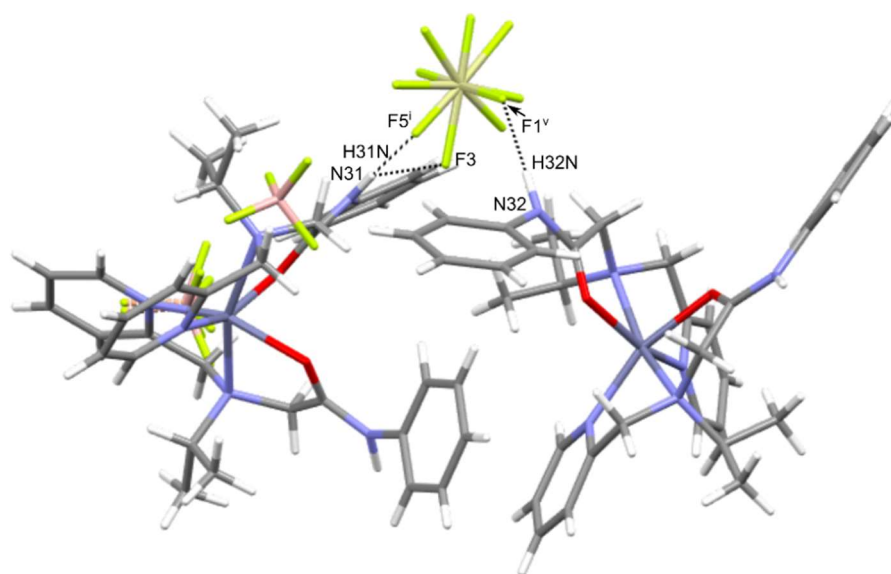

**Figure S57.** Hydrogen bonds between amide N-H groups of coordinated ligands to  $\text{Zn}^{2+}$  and fluorine acceptors from the  $[\text{SiF}_6]^{2-}$  anions in vicinity listed in Table 3. The phenyl groups from neighbouring  $[\text{Zn}(\text{L}_2)]^{2+}$  cations form a specific contact arrangement.

**Table S3.** Table of Hydrogen bond parameters in crystal structure of  $[\text{Zn}(\text{L})_2][\text{SiF}_6][\text{BF}_4]_2$

| Donor-H...Acceptor         | D-H (Å) | H...A (Å) | H...A (Å) | D-H...A (°) |
|----------------------------|---------|-----------|-----------|-------------|
| N31-H31N...F3              | 0.83(4) | 1.97(4)   | 2.710(4)  | 148(4)      |
| N31-H31N...F5 <sup>i</sup> | 0.83(4) | 2.08(4)   | 2.881(4)  | 162(4)      |
| N32-H32N...F1 <sup>v</sup> | 0.99(4) | 1.82(4)   | 2.791(3)  | 165(3)      |

Symmetry codes: (i)  $1/2-y, 1/2-x, 1/2-z$ ; (v)  $1-z, -y, -1/2+x$



## Additional characterization

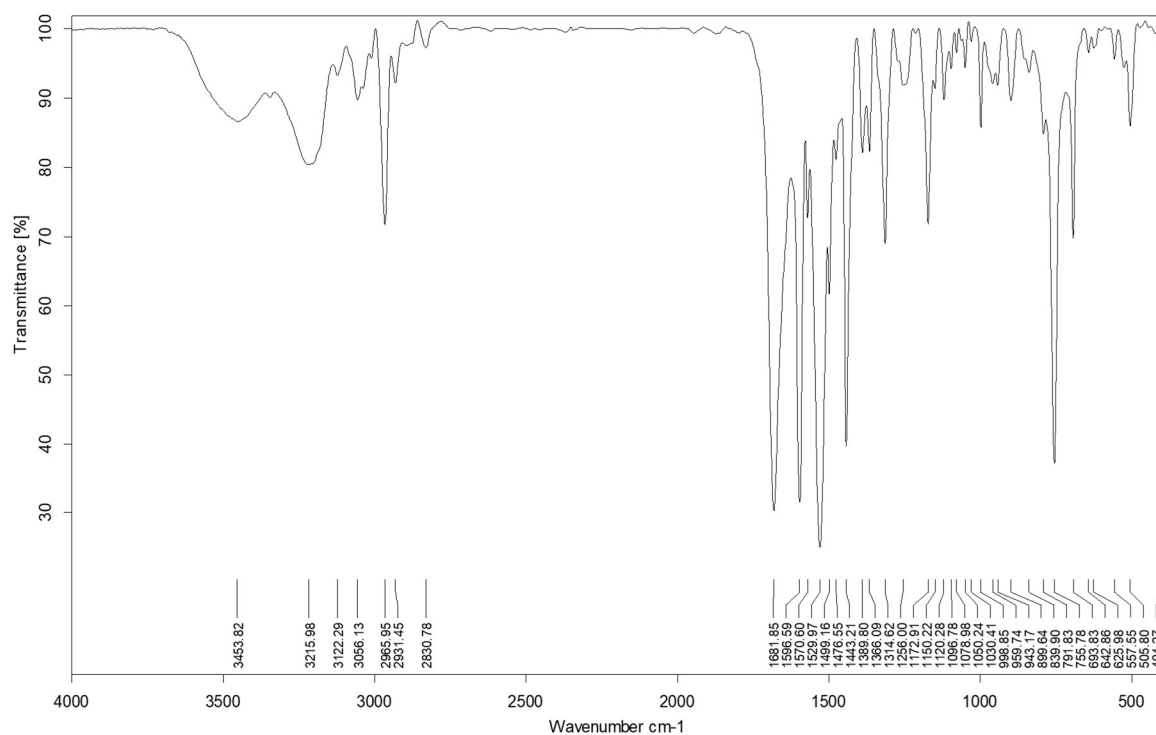

**Figure S58.** IR (KBr) spectrum of **L**

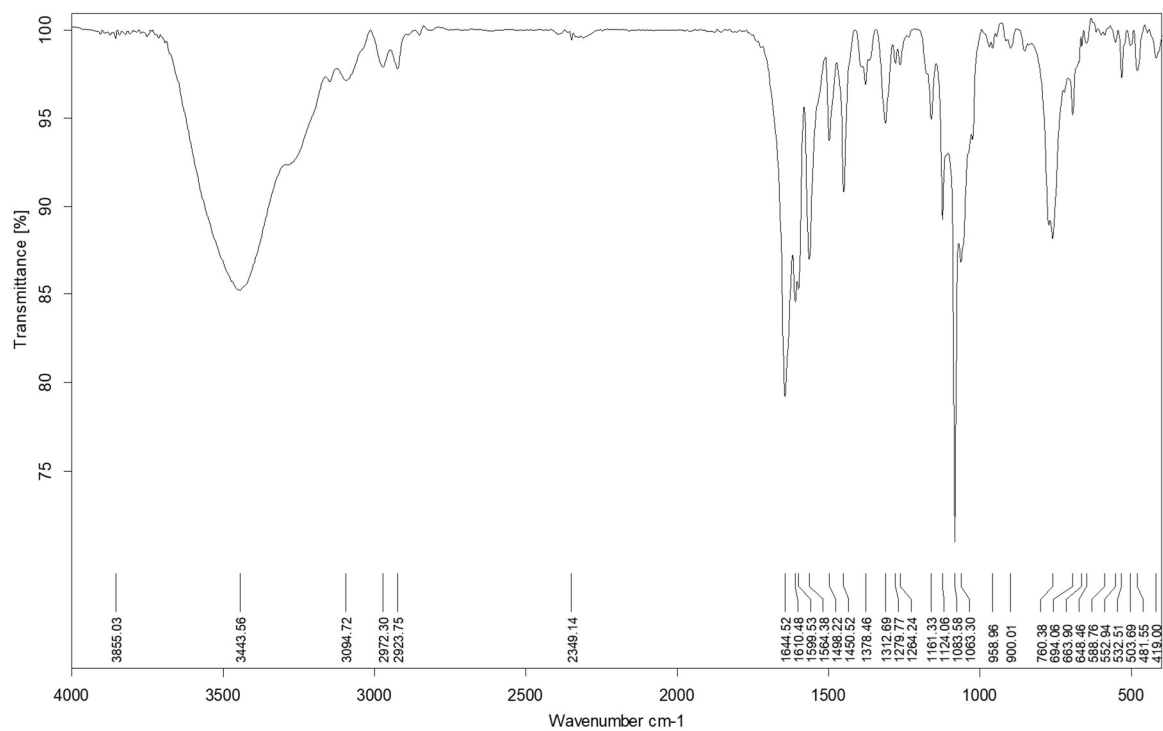

**Figure S59.** IR (KBr) spectrum of  $[\text{Zn}(\text{L})_2]_2[\text{SiF}_6][\text{BF}_4]$

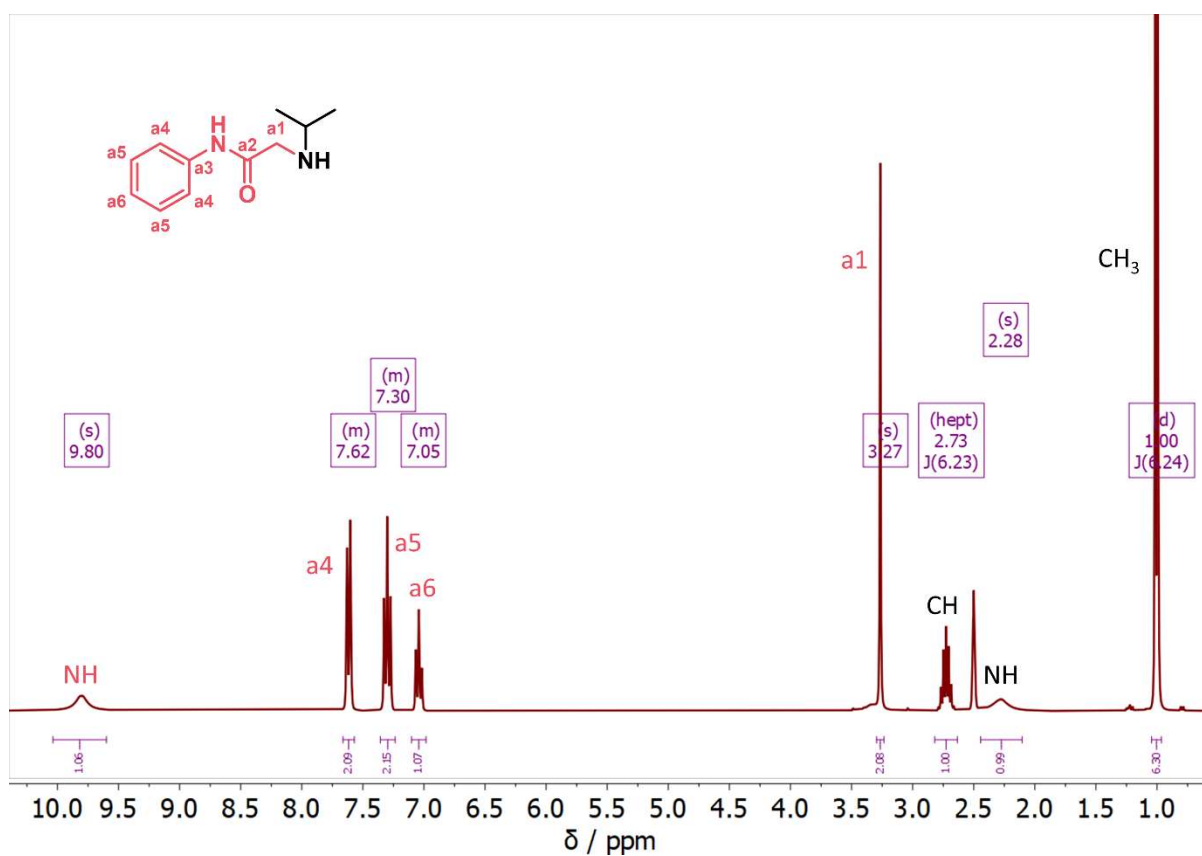

**Figure S60.** <sup>1</sup>H NMR ((CD<sub>3</sub>)<sub>2</sub>SO) of P2

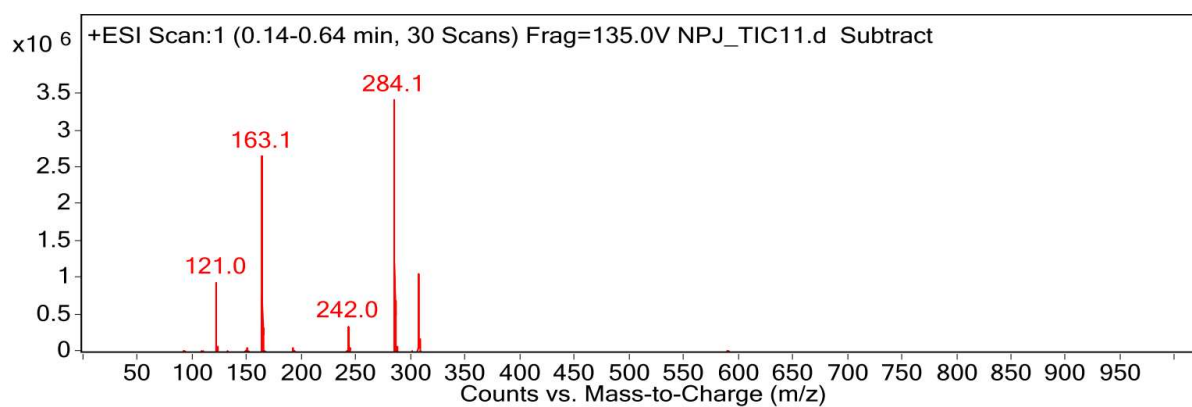

**Figure S61.** ESI-MS of L
